# Supplementary material for: Vangl2 suppresses NF-κB signaling and ameliorates sepsis by targeting p65 for NDP52-mediated autophagic degradation
Source: eLife journal article supplement (doi:10.7554/elife.87935), 2023-05-12

Figure 2

A

$\alpha$ -p-p65

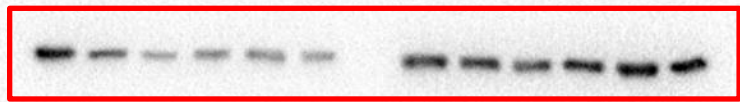

$\alpha$ -p65

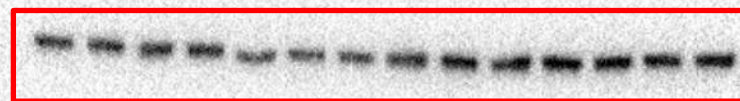

$\alpha$ -pik $\alpha$ / $\beta$

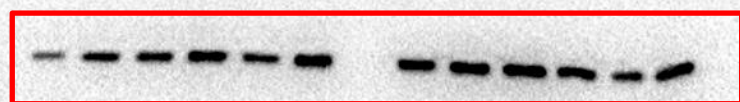

$\alpha$ -ik $\alpha$ / $\beta$

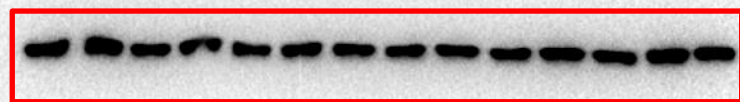

$\alpha$ -Vangl2

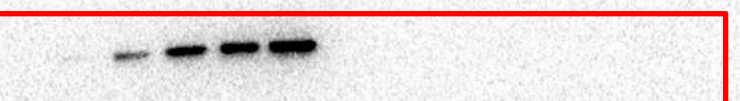

$\alpha$ -Tubulin

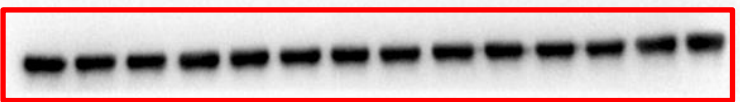

Figure 2

B

$\alpha$ -p-p65

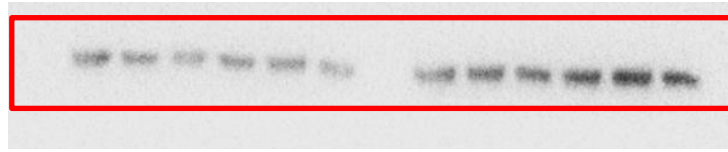

$\alpha$ -p65

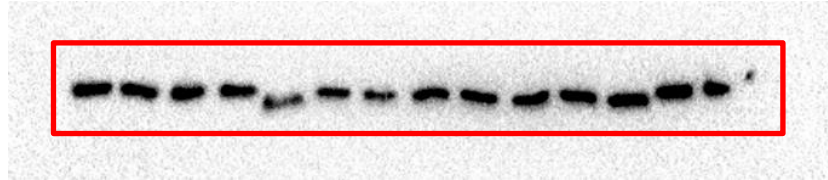

$\alpha$ -pik $\alpha$ / $\beta$

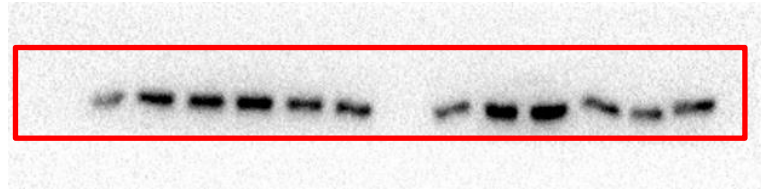

$\alpha$ -ik $\alpha$ / $\beta$

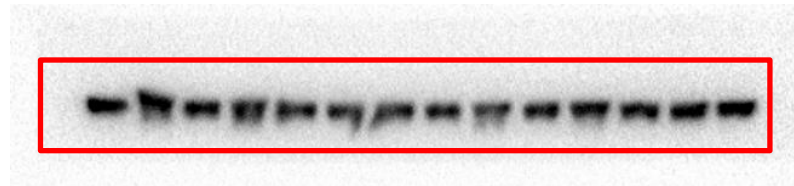

$\alpha$ -Vangl2

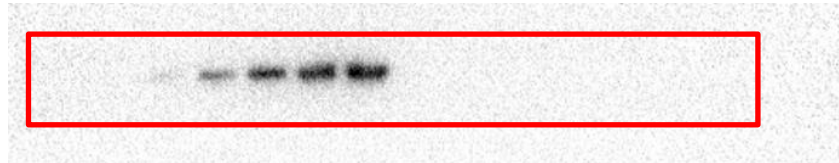

$\alpha$ -Tubulin

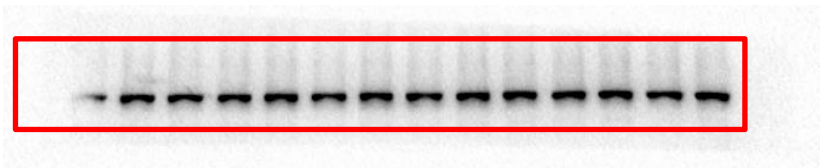

Figure 2

I

$\alpha$ -p-p65

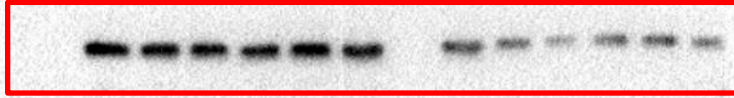

$\alpha$ -p65

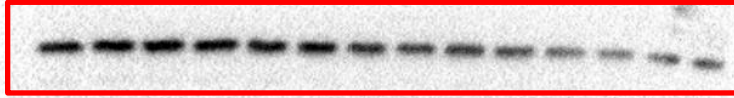

$\alpha$ -pik $\alpha$ / $\beta$

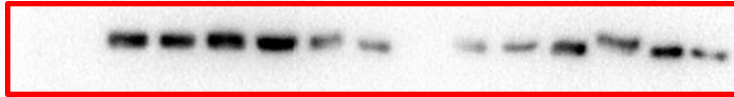

$\alpha$ -ik $\alpha$ / $\beta$

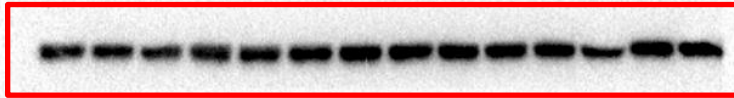

$\alpha$ -Vangl2

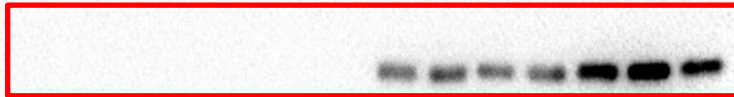

$\alpha$ -Tubulin

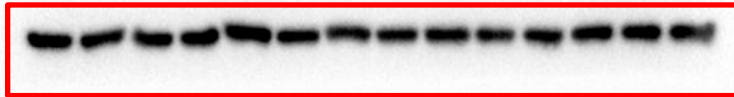

Supplement: fig2-data1 [file elife-87935-fig2-data1-v1.pdf]
