# Supplementary material for: Vangl2 suppresses NF-κB signaling and ameliorates sepsis by targeting p65 for NDP52-mediated autophagic degradation
Source: eLife journal article supplement (doi:10.7554/elife.87935), 2023-05-12

Figure 4

I

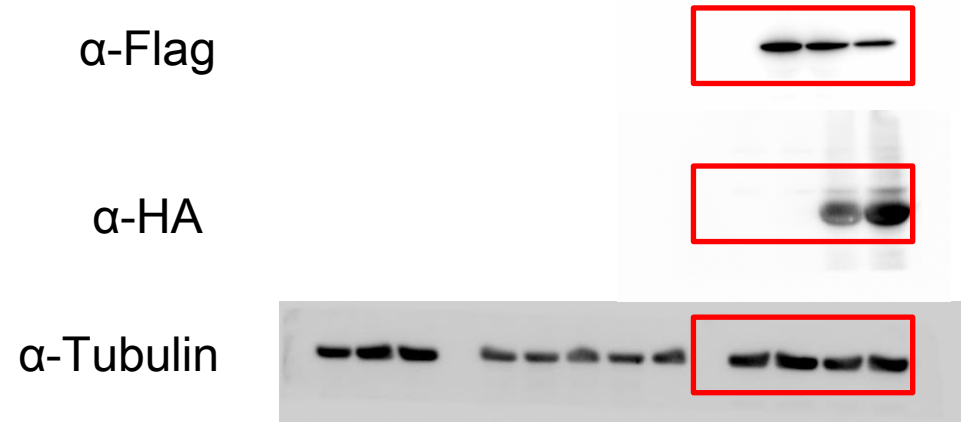

Figure 4

I

$\alpha$ -HA

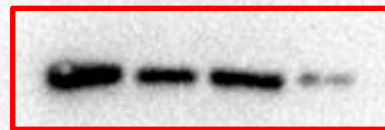

$\alpha$ -Flag

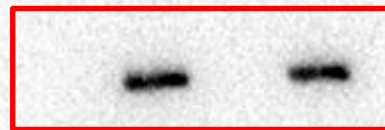

$\alpha$ -Histone

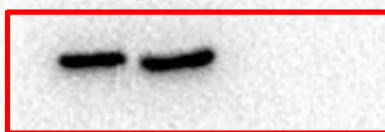

$\alpha$ -GAPDH

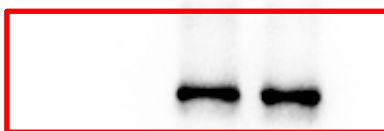

Figure 4

D

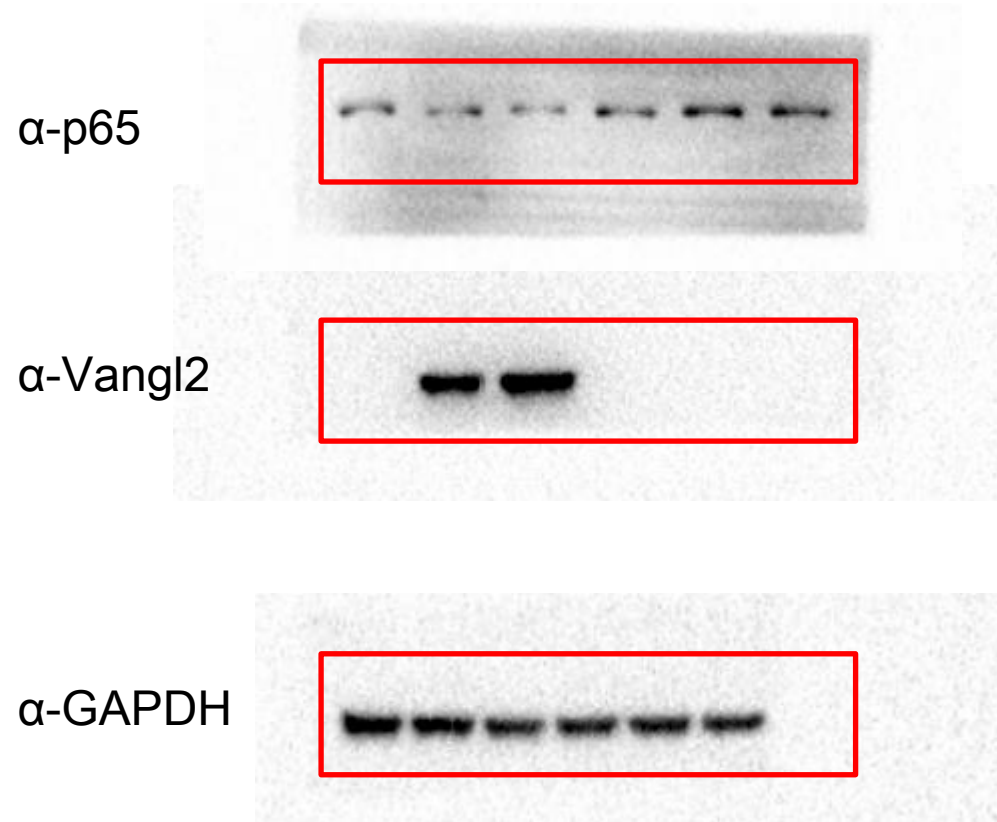

Figure 4

E

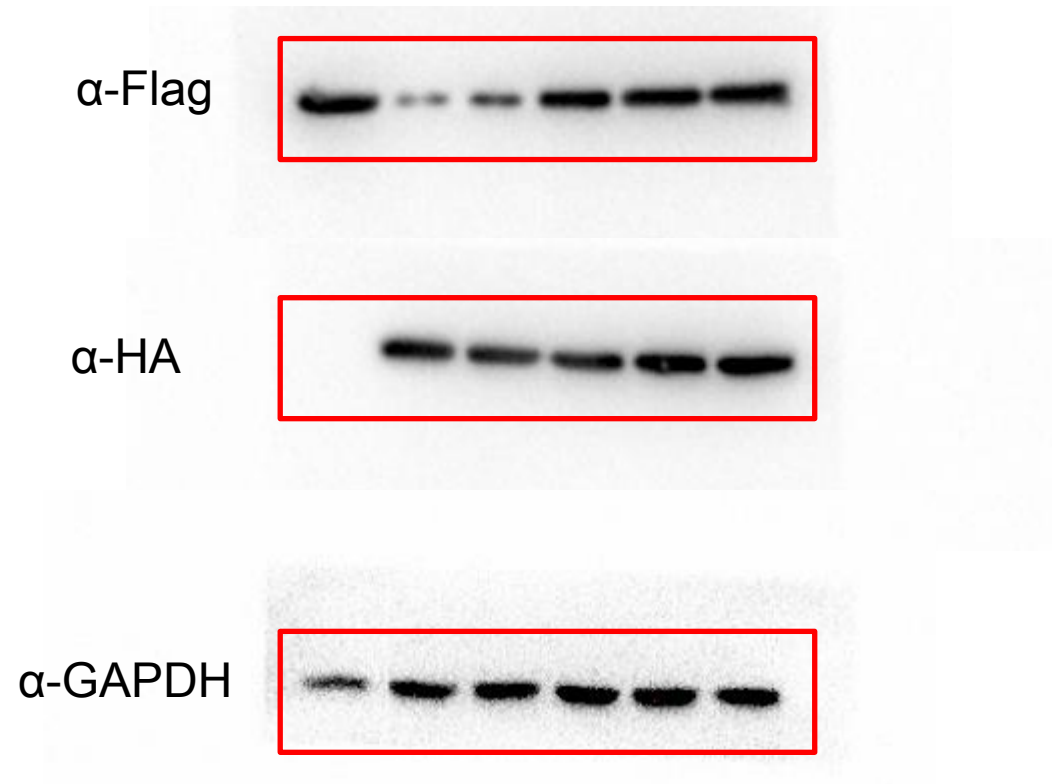

Figure 4

F

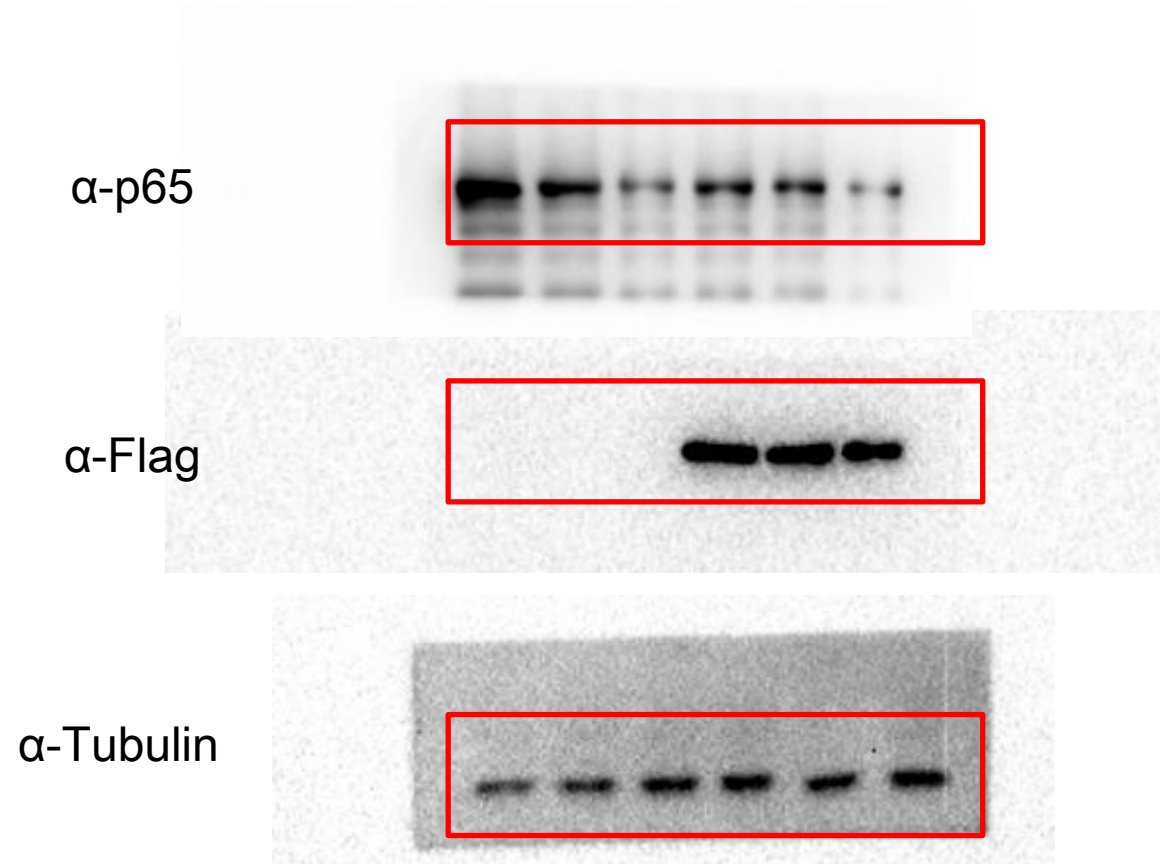



Figure 4-figure supplement 4

A and B

|             |    |       |        |   |                       |   |   |   |   |
|-------------|----|-------|--------|---|-----------------------|---|---|---|---|
| HA-p65      | WT | S536A | HA-p65 | + | +                     | + | + |   |   |
| Flag-Vangl2 | -  | +     | -      | + | -                     | - | - |   |   |
|             |    |       |        |   | Flag-Vangl2 (S82/84A) | - | - | - | + |

$\alpha$ -HA

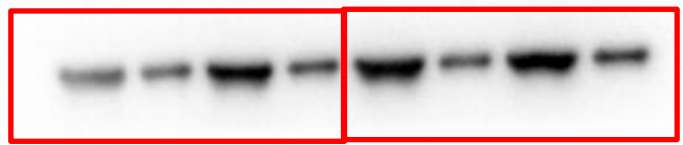

$\alpha$ -Flag

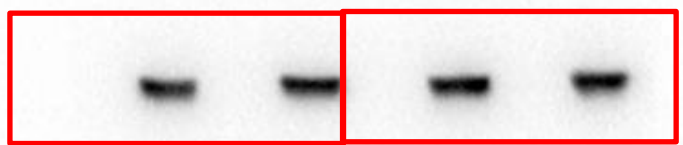

$\alpha$ -Tubulin

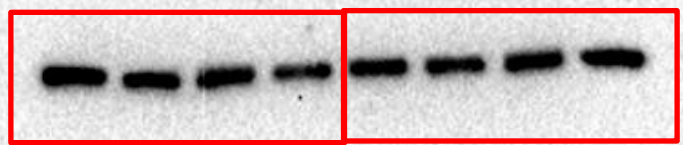

Figure 4-figure supplement 4

C

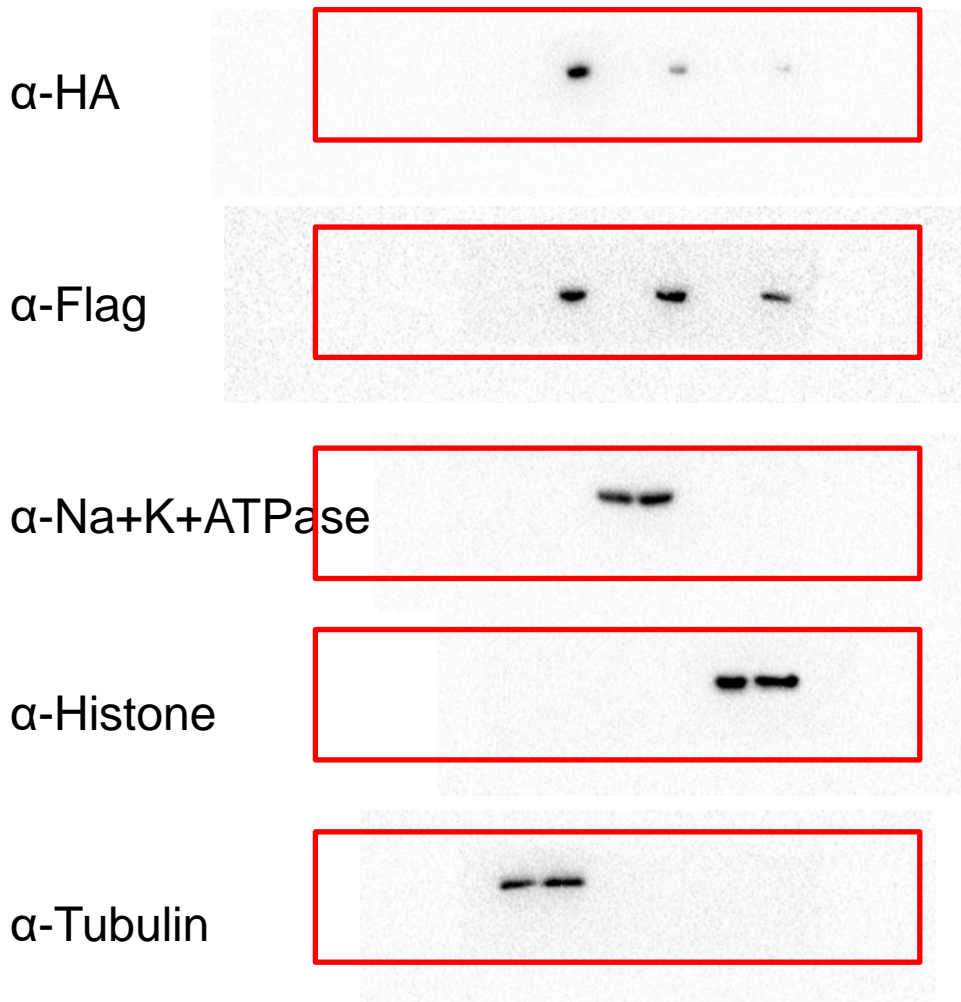





Figure 4-figure supplement 4

E

$\alpha$ -HA

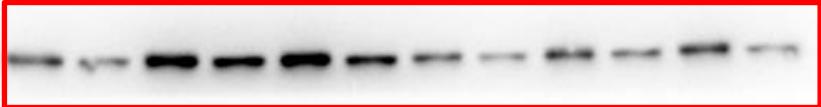

$\alpha$ -Flag

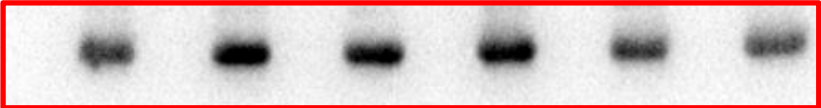

$\alpha$ -Tubulin

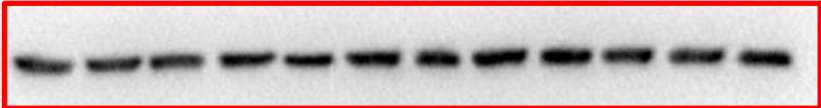

Figure 4-figure supplement 4

F

$\alpha$ -p65

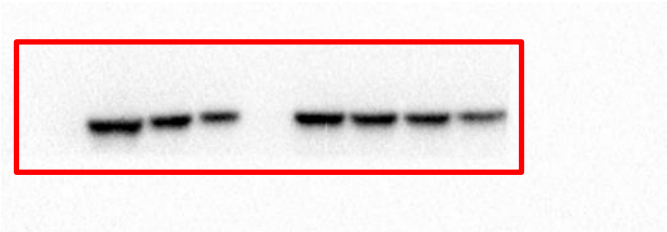

$\alpha$ -ATG5

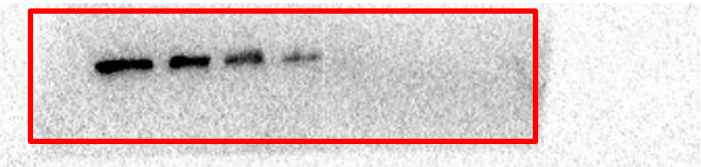

$\alpha$ -Tubulin

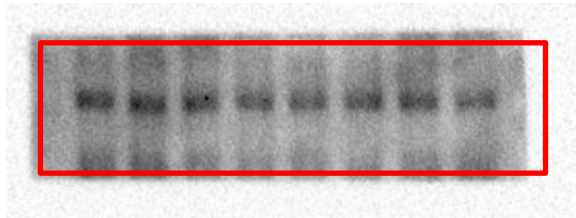

Figure 4-figure supplement 4

G

$\alpha$ -p65

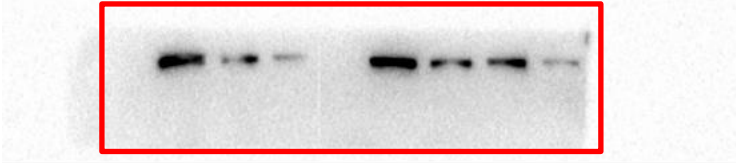

$\alpha$ -Beclin1

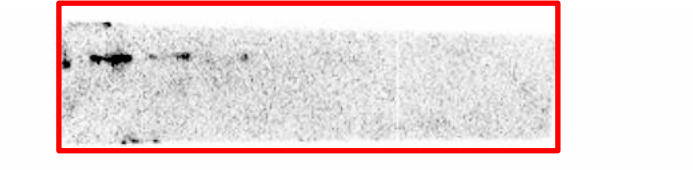

$\alpha$ -Tubulin

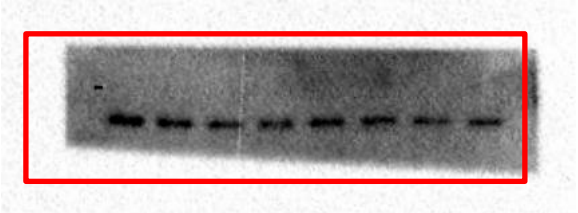

Supplement: fig4-data1 [file elife-87935-fig4-data1-v1.pdf]
