# Supplementary material for: Vangl2 suppresses NF-κB signaling and ameliorates sepsis by targeting p65 for NDP52-mediated autophagic degradation
Source: eLife journal article supplement (doi:10.7554/elife.87935), 2023-05-12

Figure 1-figure supplement 1

C-E

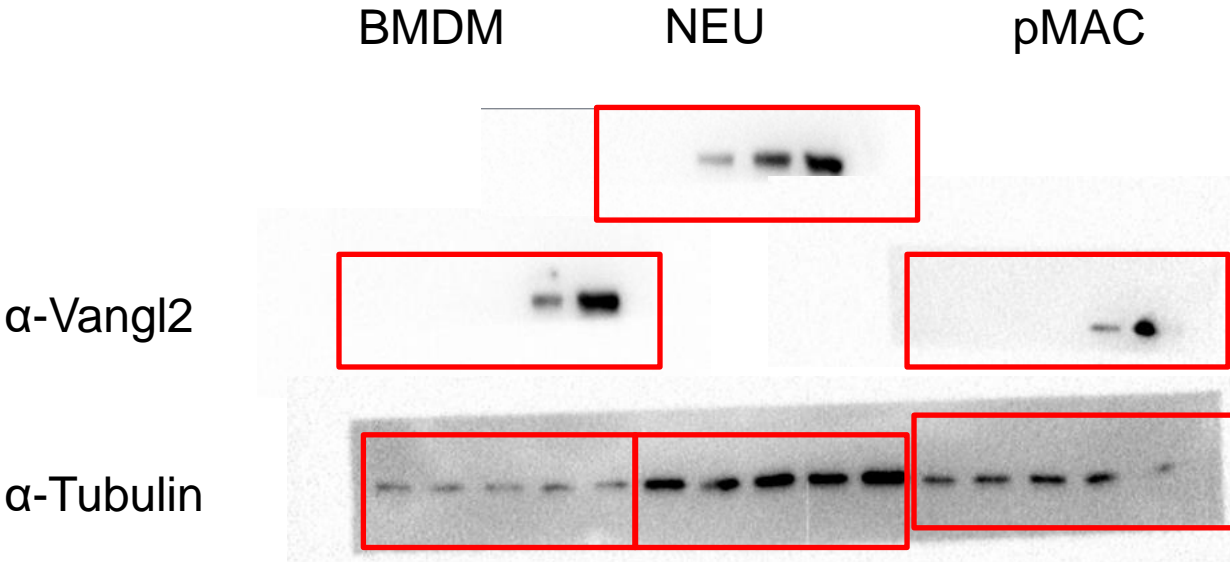

Supplement: fig1-data1 [file elife-87935-fig1-data1-v1.pdf]
