# Supplementary material for: Vangl2 suppresses NF-κB signaling and ameliorates sepsis by targeting p65 for NDP52-mediated autophagic degradation
Source: eLife journal article supplement (doi:10.7554/elife.87935), 2023-05-12

Figure 3

E

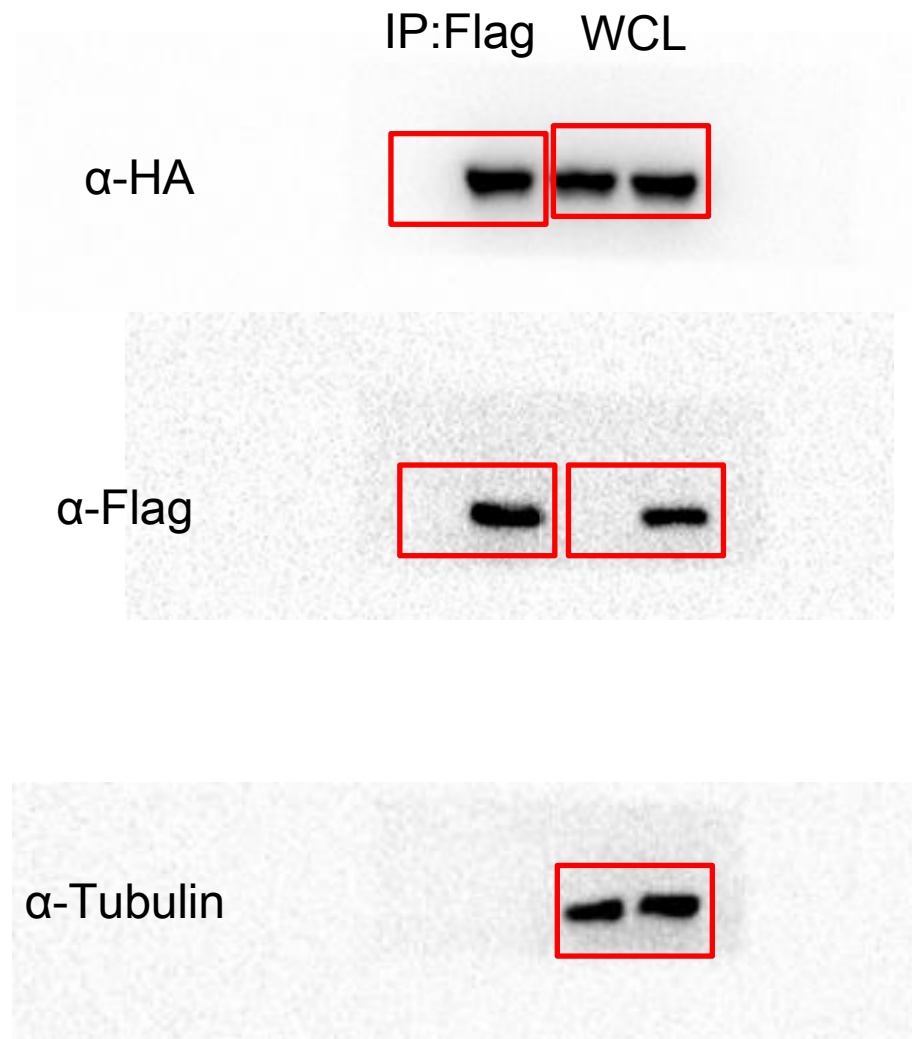

Figure 3

E

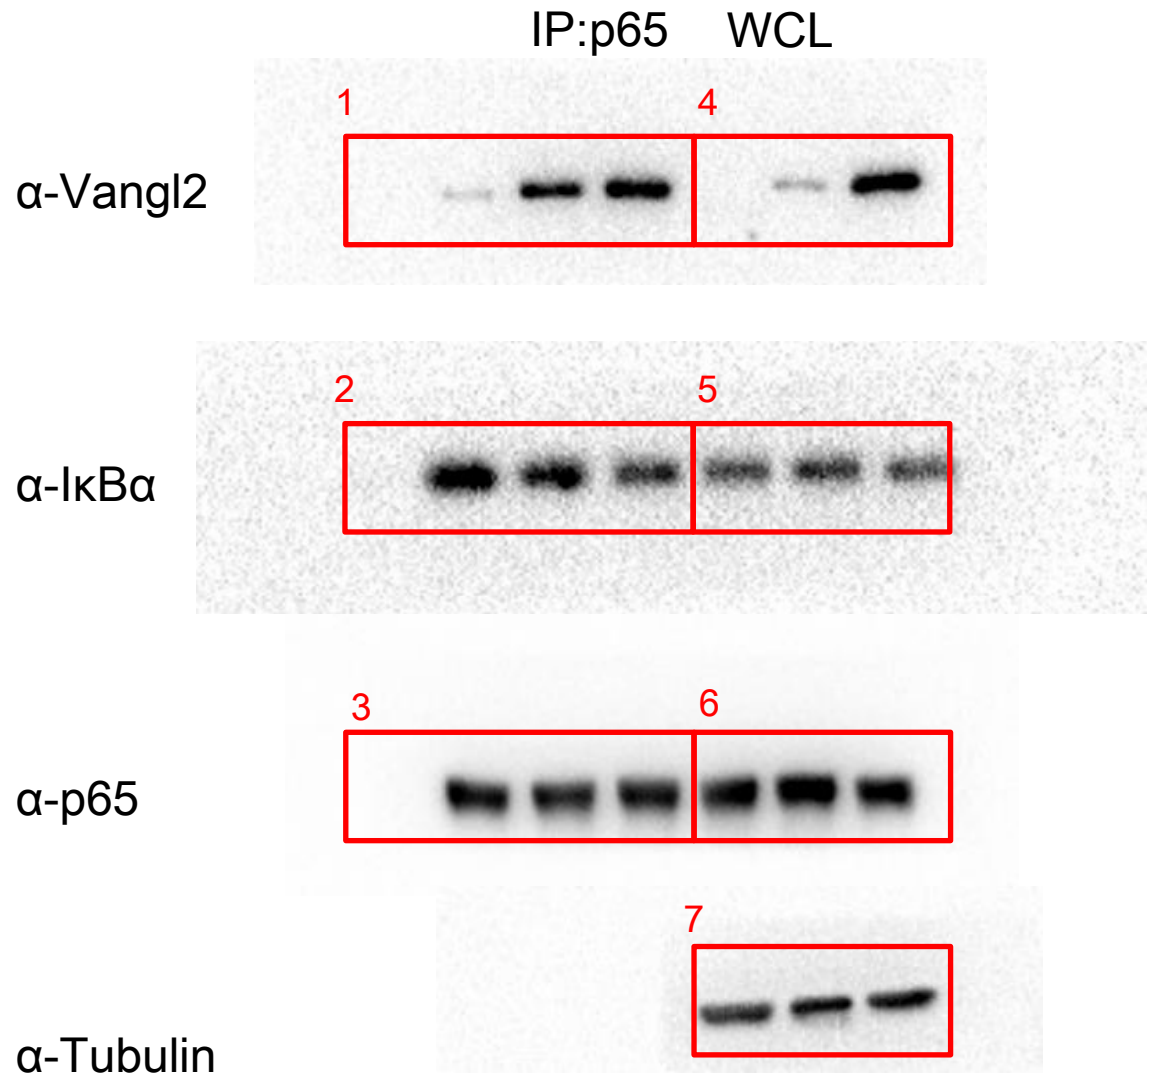

Figure 3

H

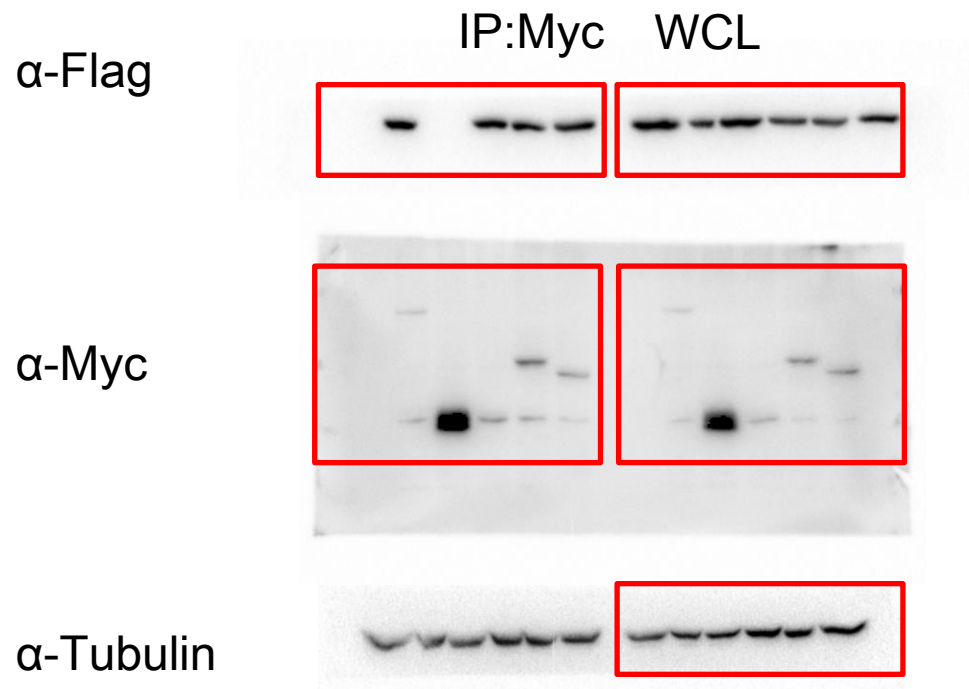

Figure 3

I

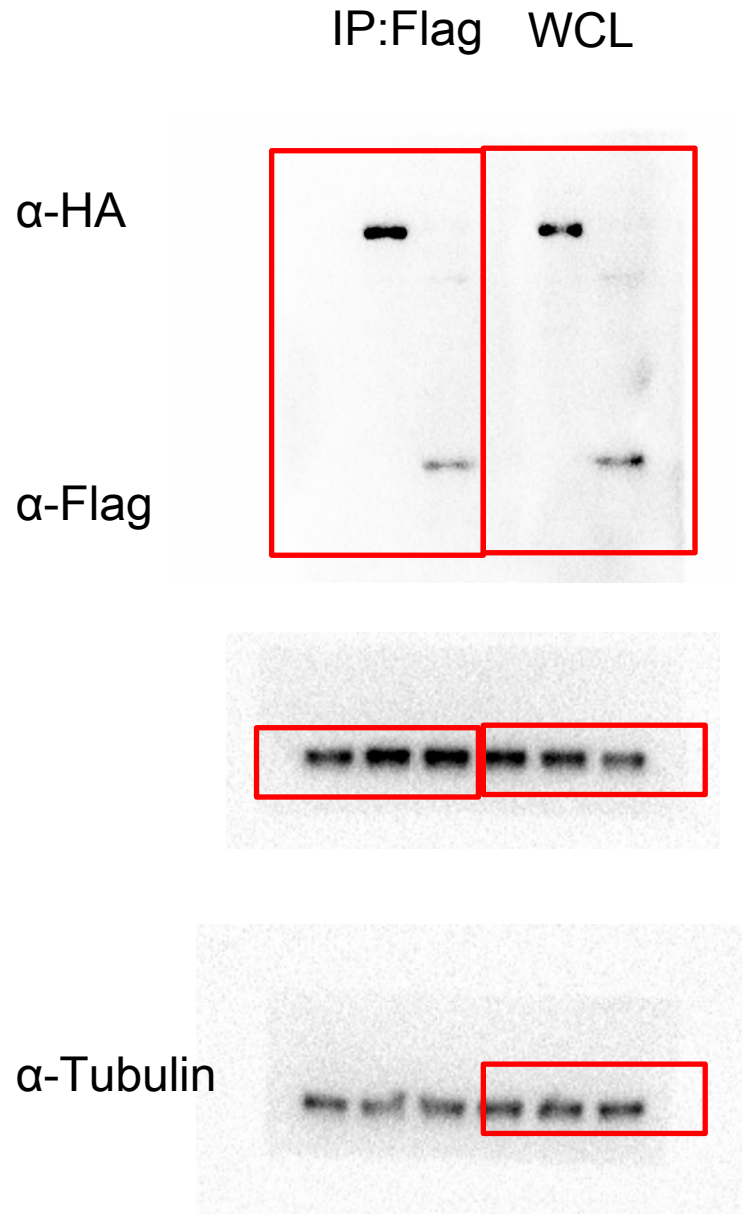

Figure 3-figure supplement 3

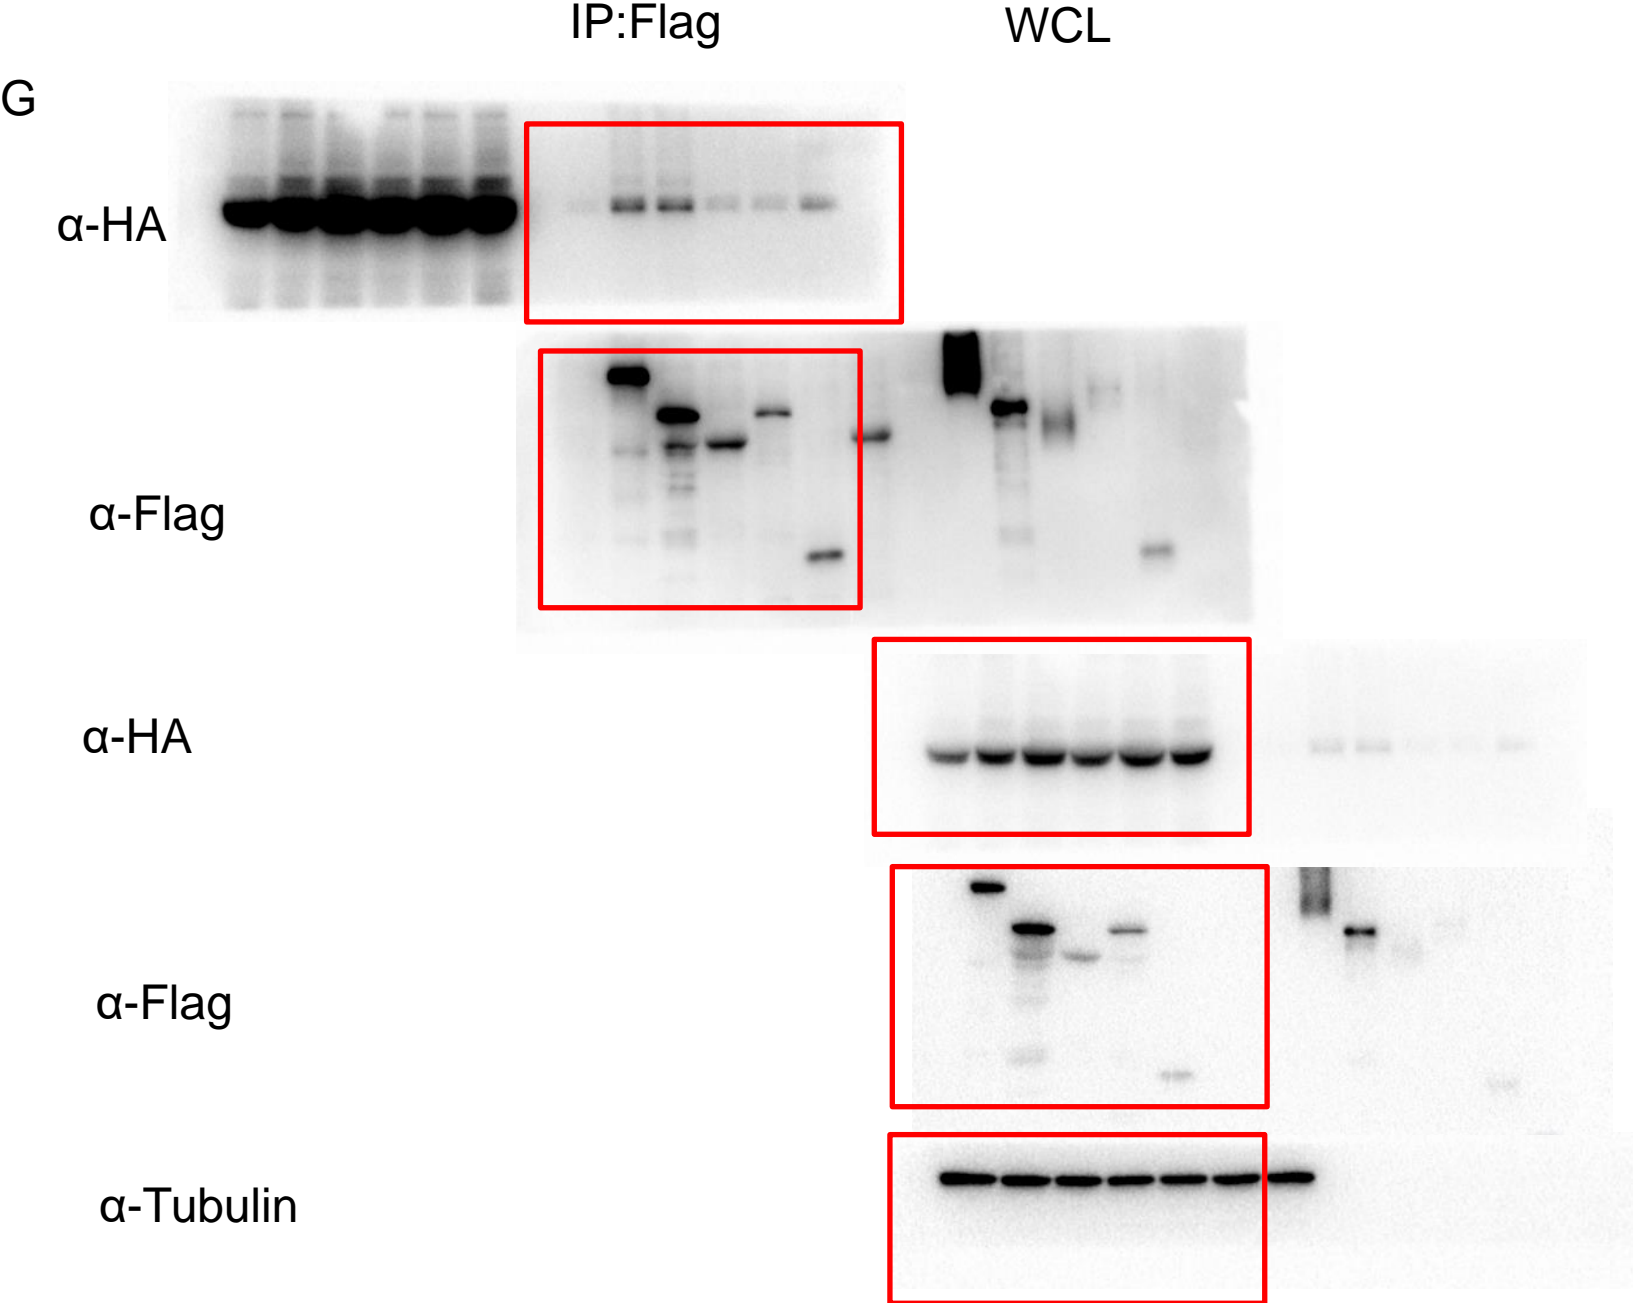

Figure 3-figure supplement 3

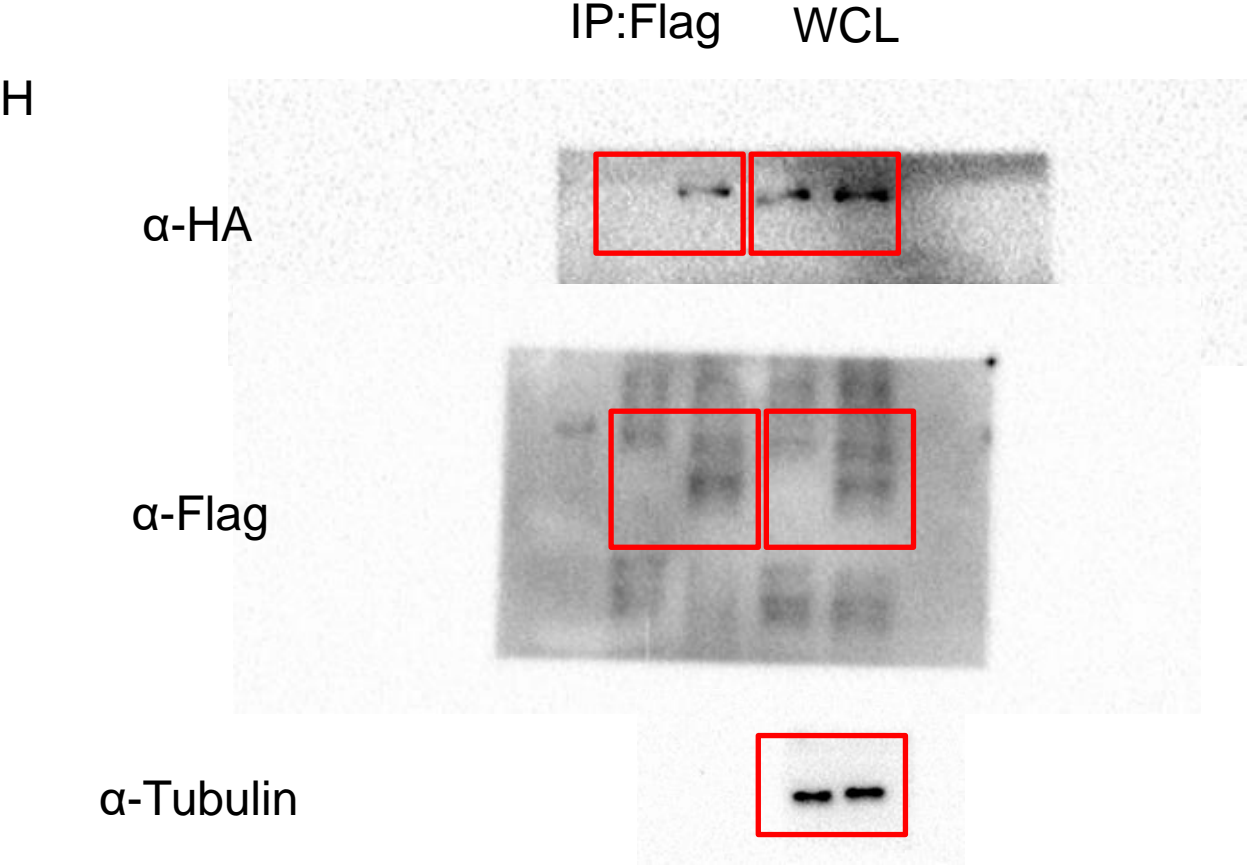

Figure 3-figure supplement 3

IP:Vangl2 WCL

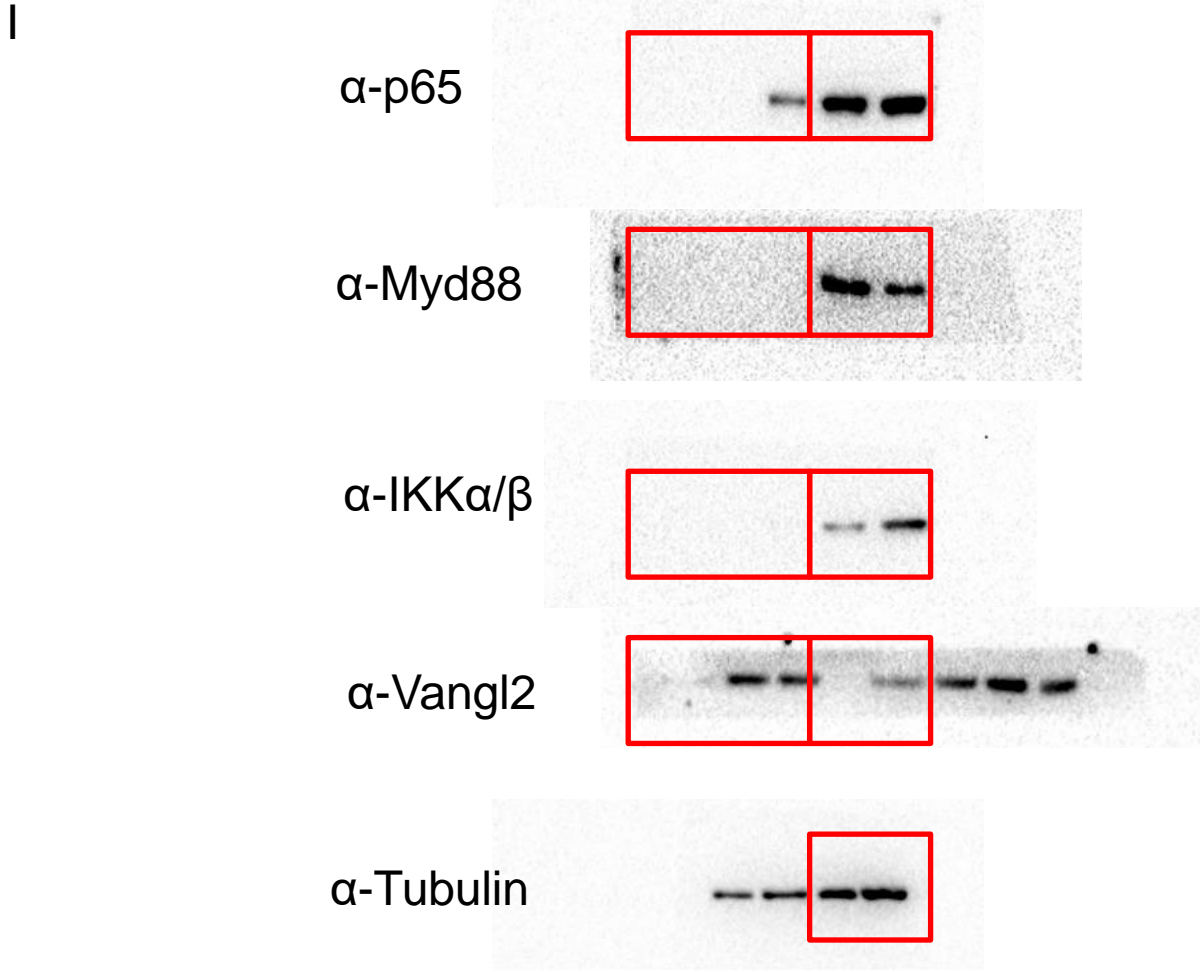

Figure 3-figure supplement 3

L

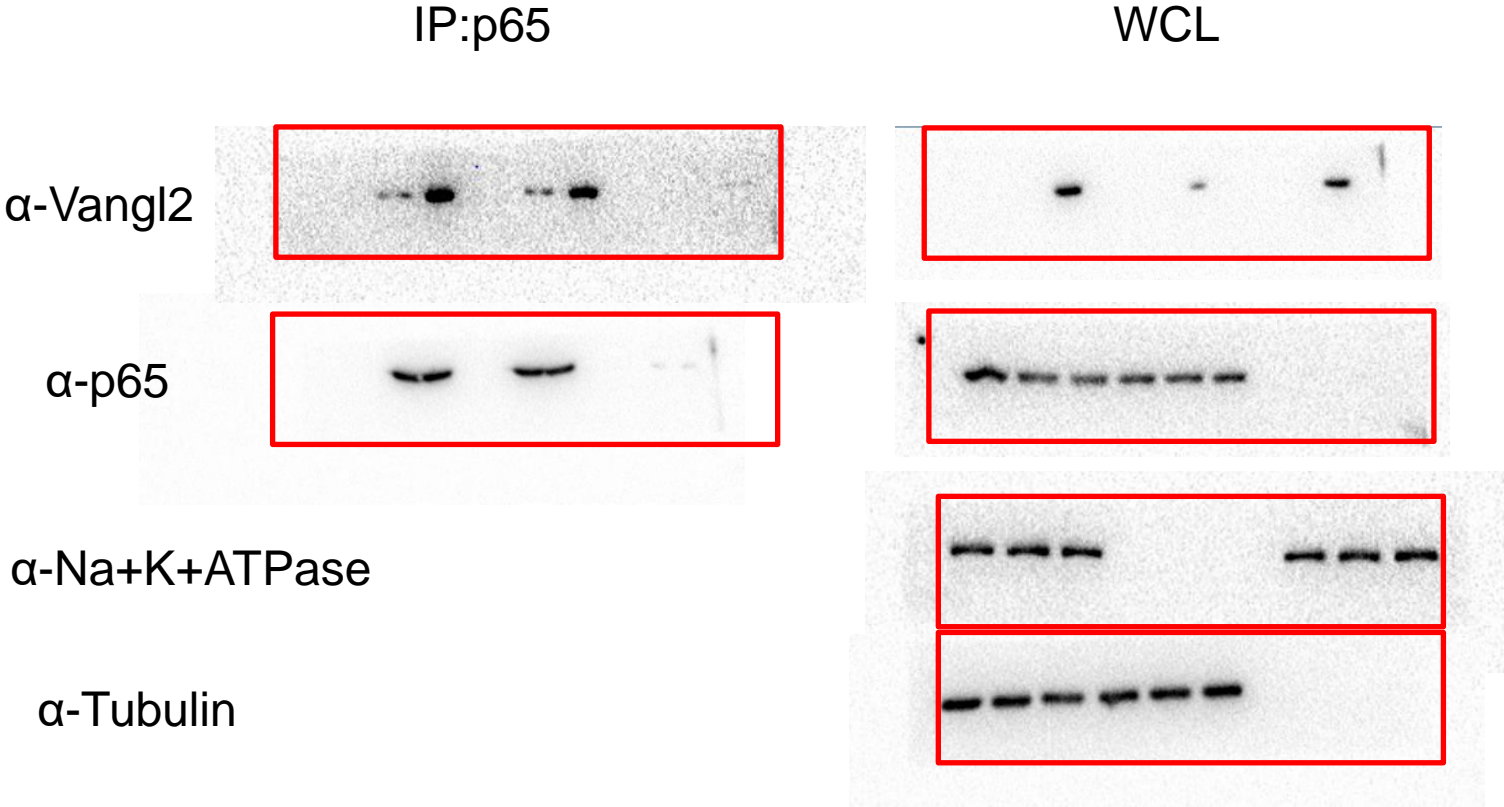



Figure 3-figure supplement 3

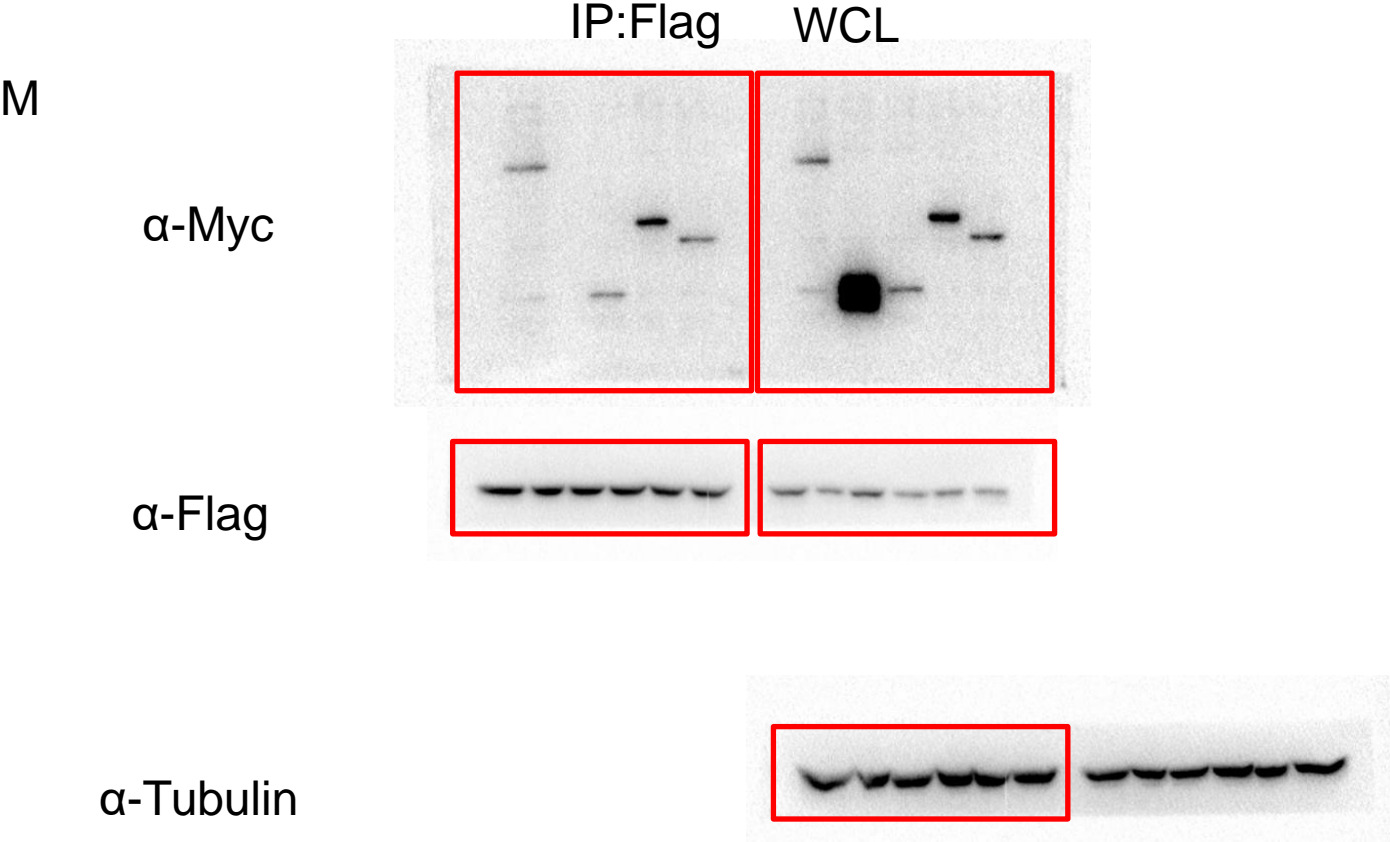

Supplement: fig3-figsupp1-data1 [file elife-87935-fig3-figsupp1-data1-v1.pdf]
