# Supplementary material for: Vangl2 suppresses NF-κB signaling and ameliorates sepsis by targeting p65 for NDP52-mediated autophagic degradation
Source: eLife journal article supplement (doi:10.7554/elife.87935), 2023-05-12

Figure 5

A

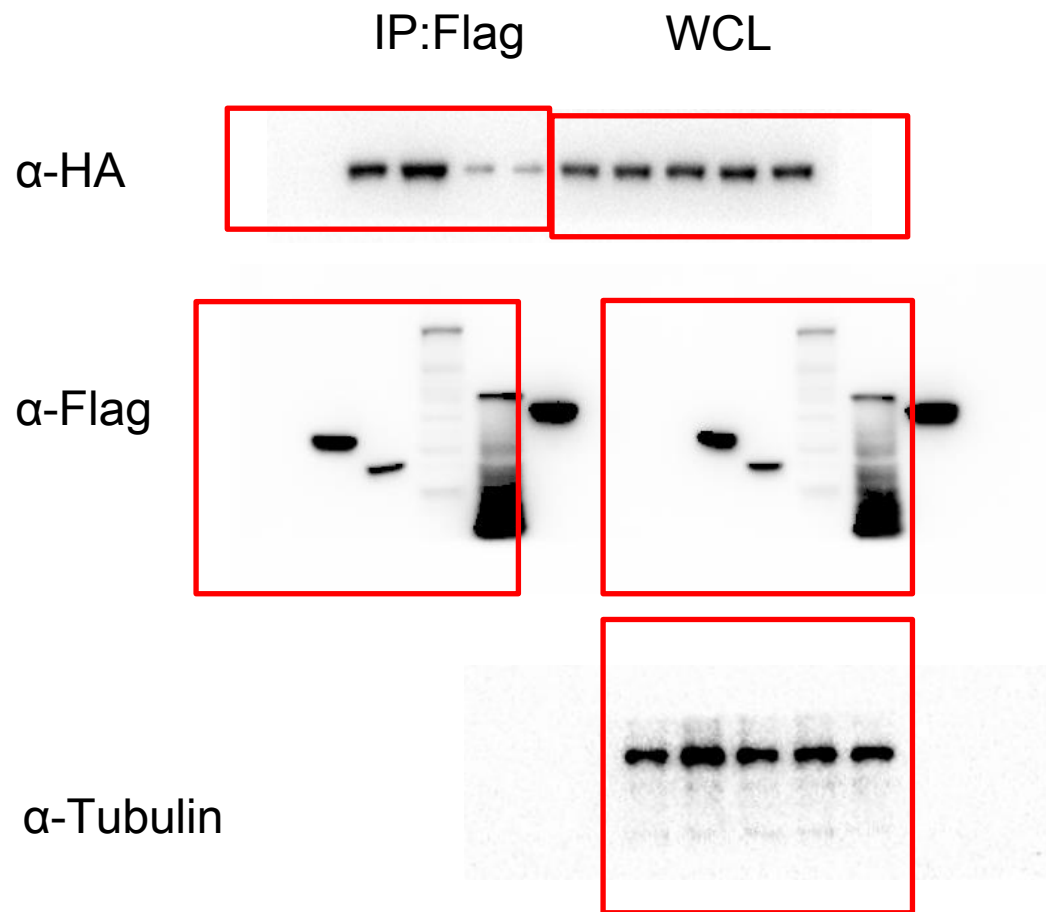

Figure 5

B

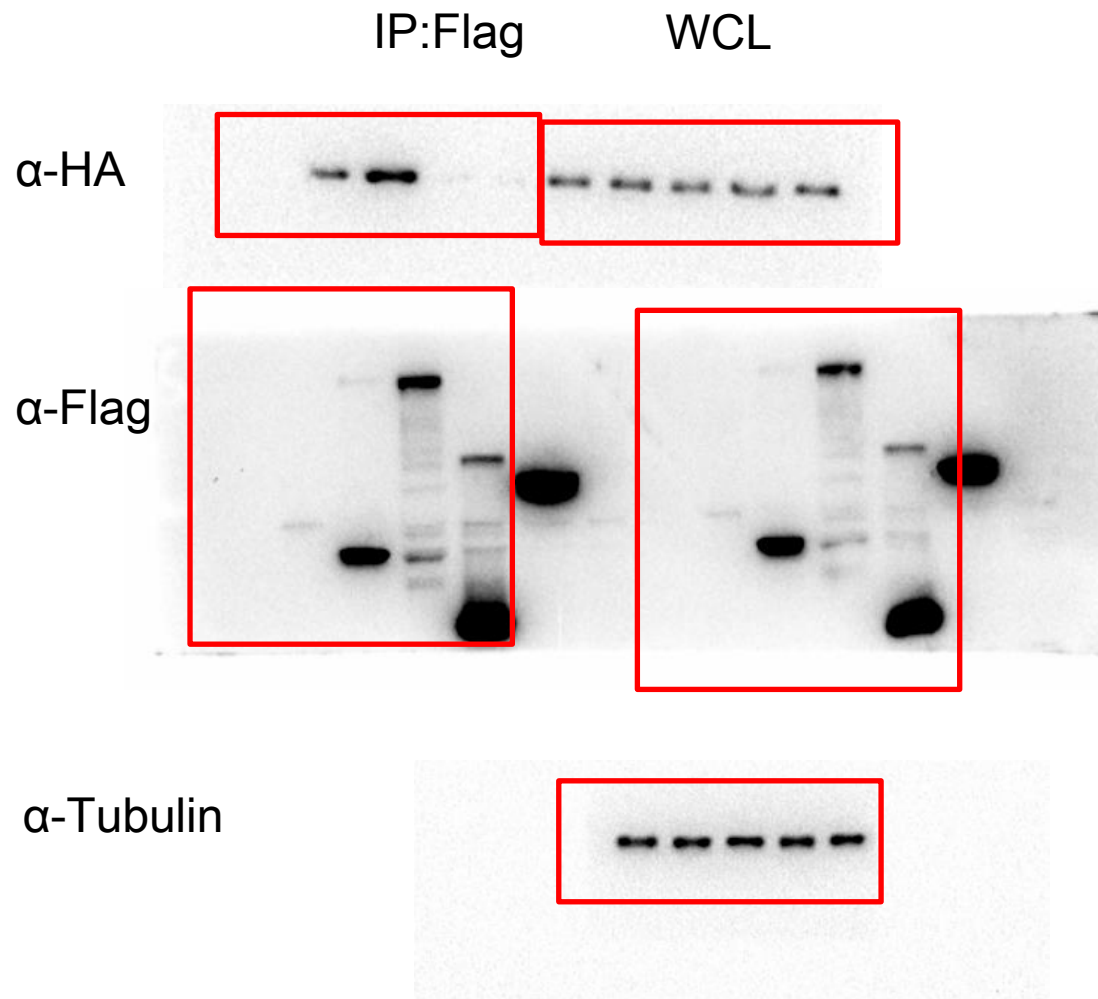

Figure 5

C

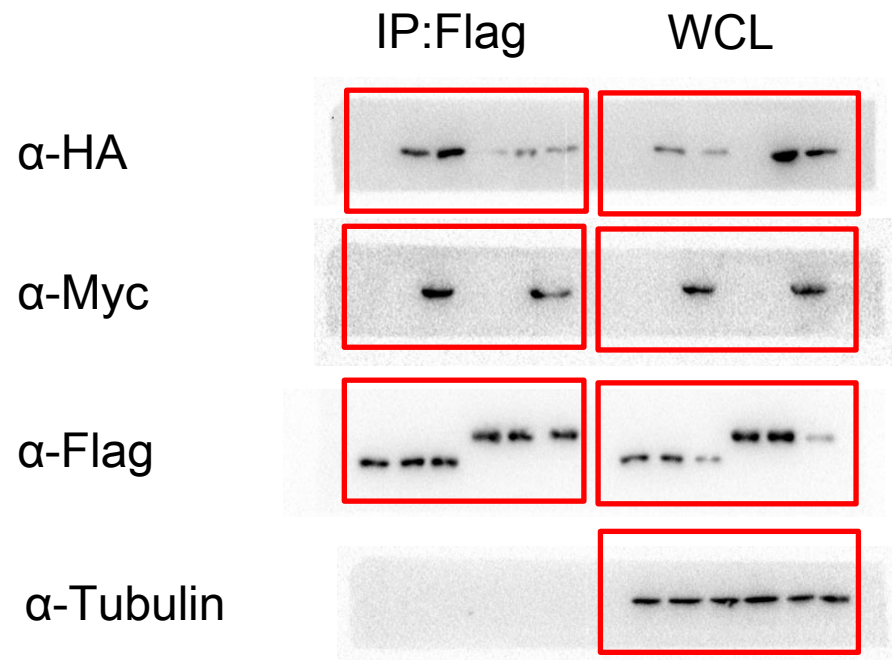

Figure 5

D

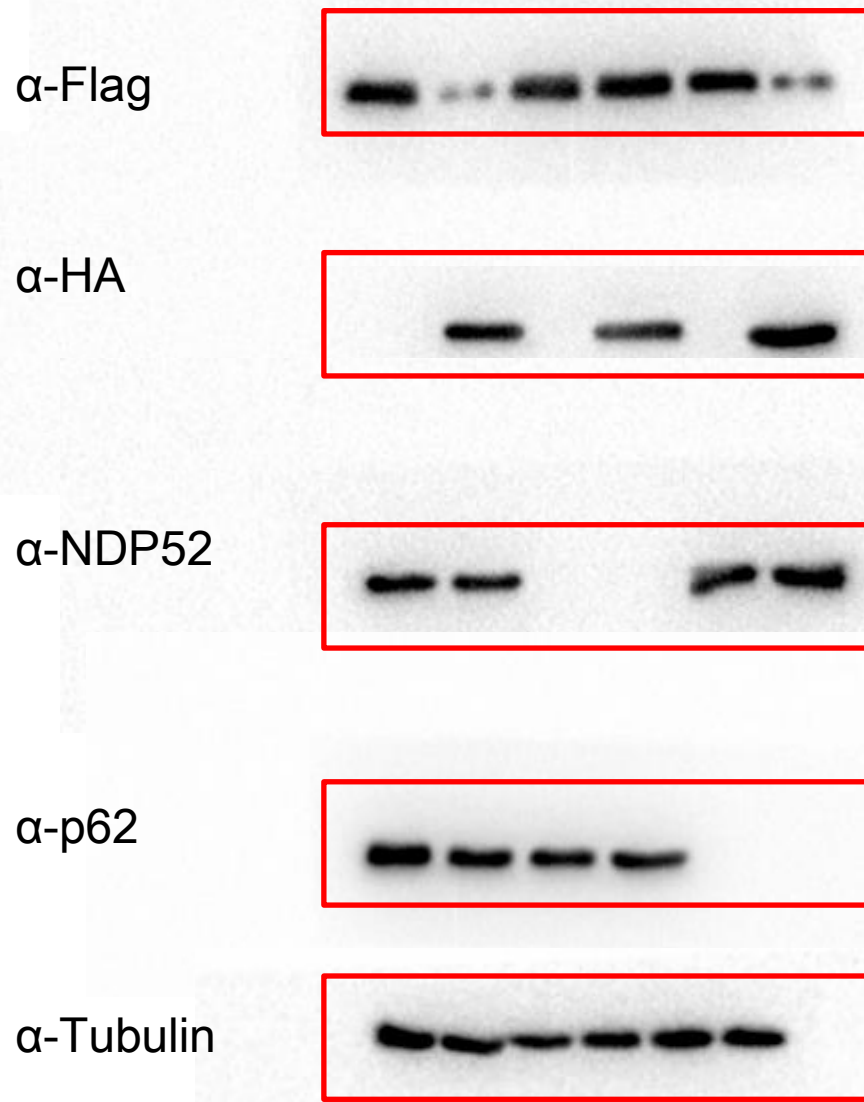

Figure 5

E

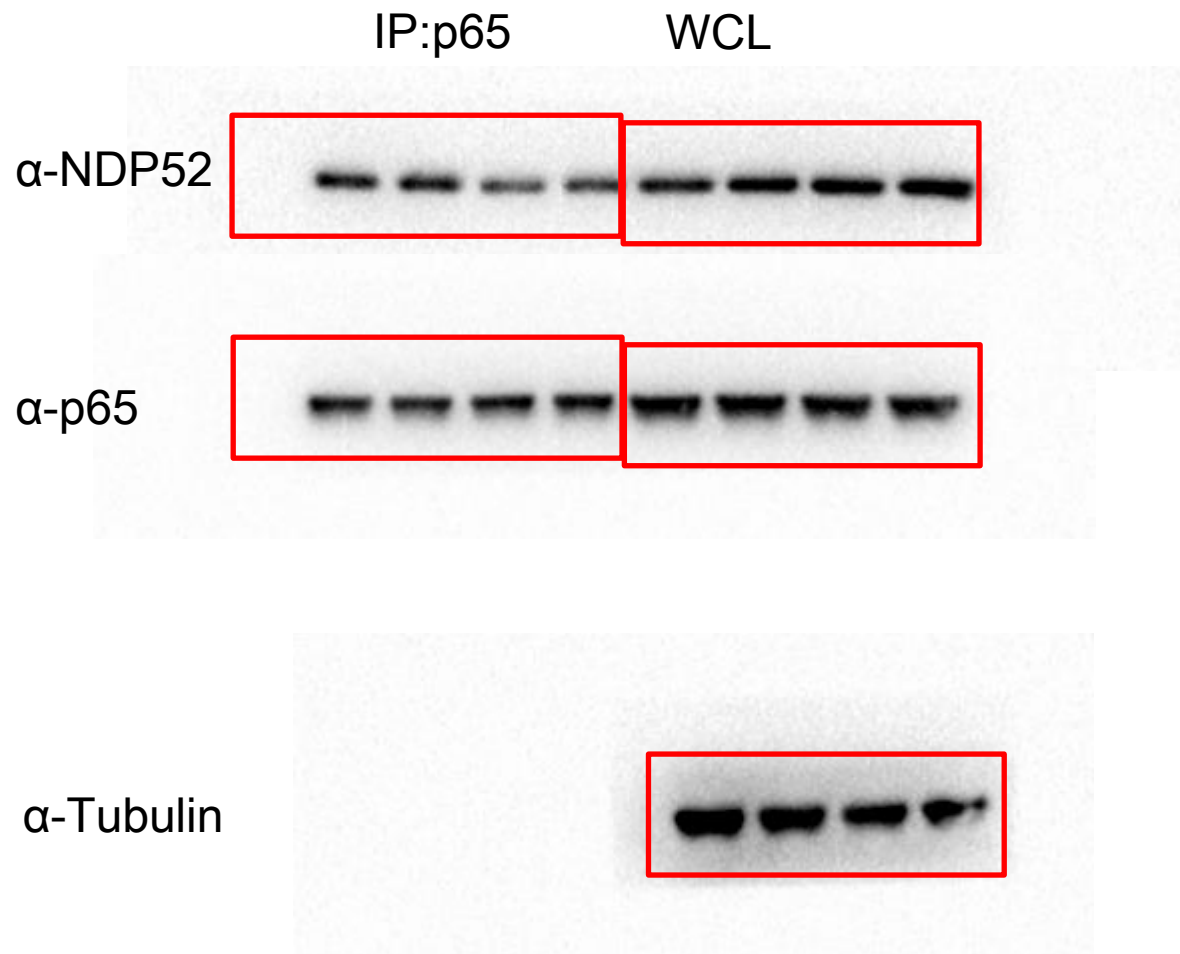

Figure 5

F

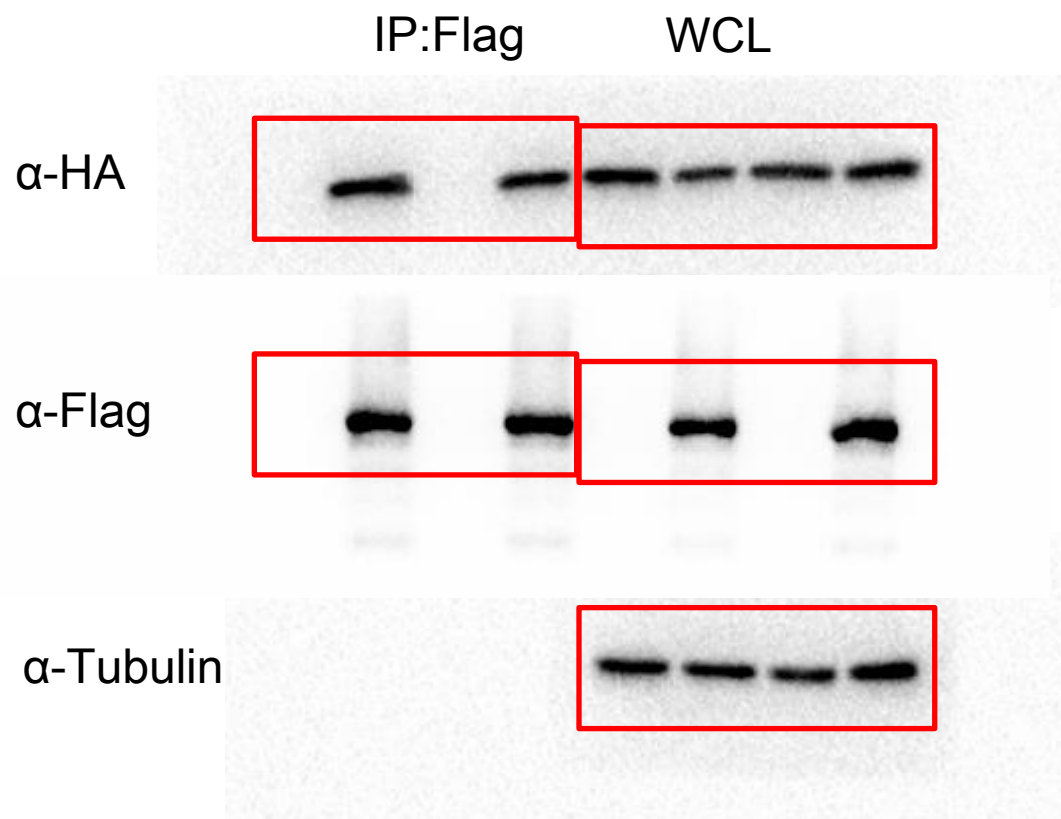

Figure 5

H

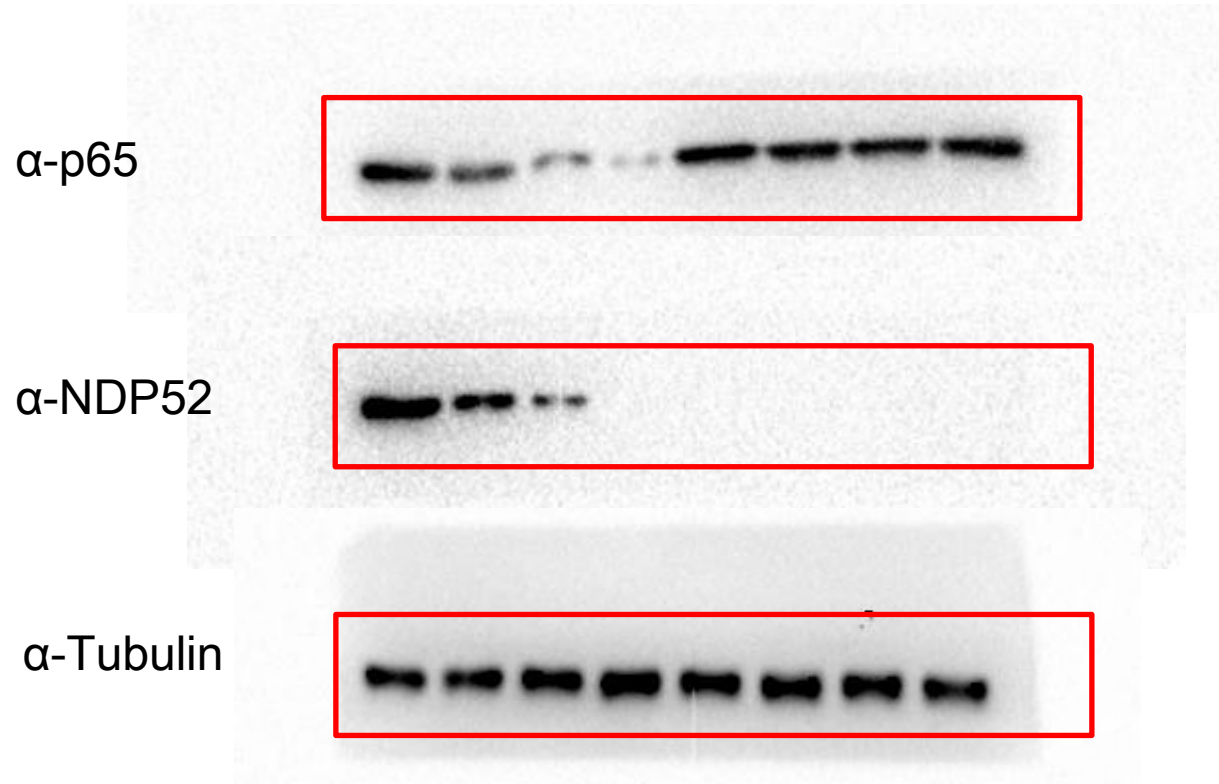

Figure 5-figure supplement 5

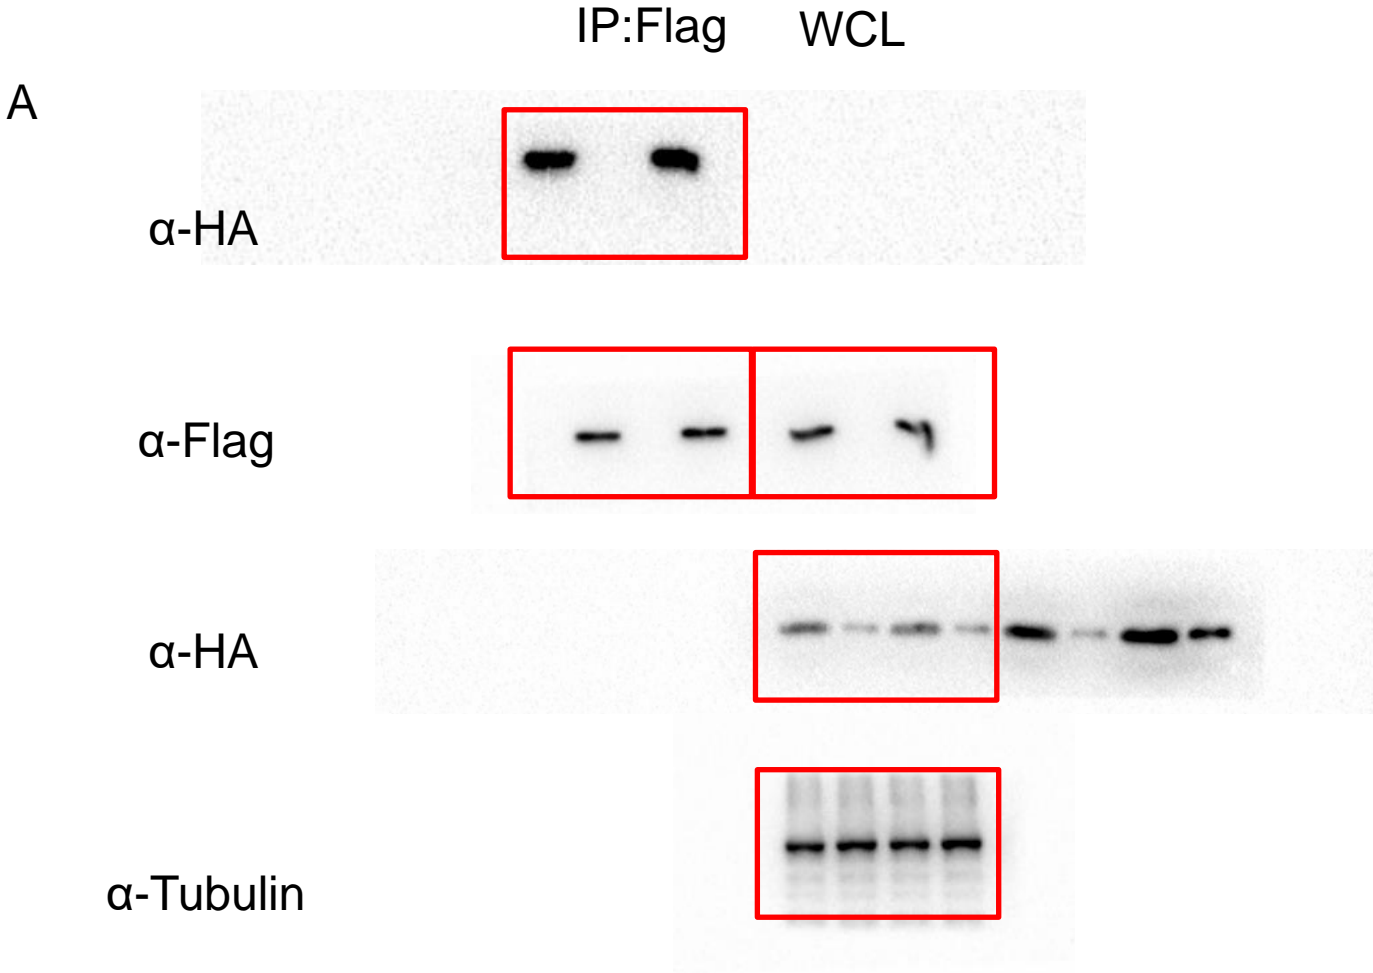



Figure 5-figure supplement 5

C

$\alpha$ -p65

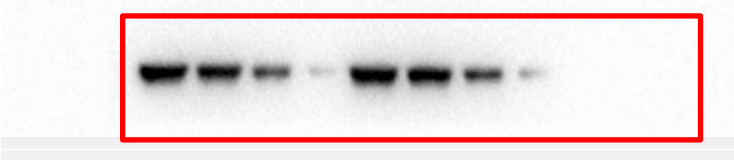

$\alpha$ -p62

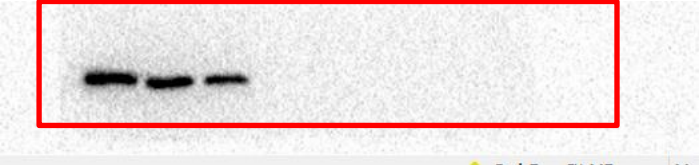

$\alpha$ -Tubulin

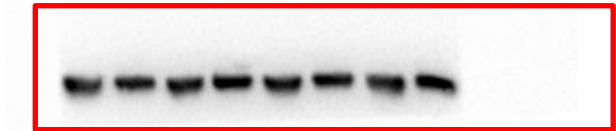

Supplement: fig5-figsupp1-data1 [file elife-87935-fig5-figsupp1-data1-v1.pdf]
