# Supplementary material for: Vangl2 suppresses NF-κB signaling and ameliorates sepsis by targeting p65 for NDP52-mediated autophagic degradation
Source: eLife journal article supplement (doi:10.7554/elife.87935), 2023-05-12

Figure 6

A

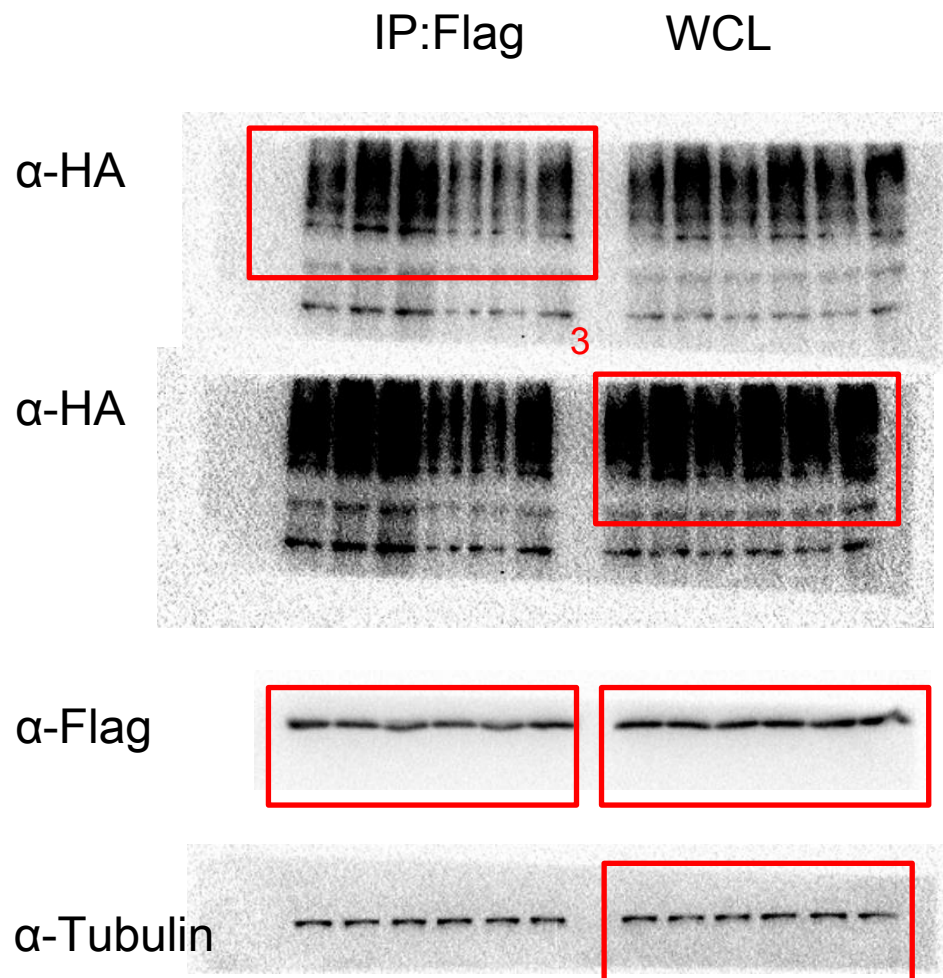

Figure 6

B

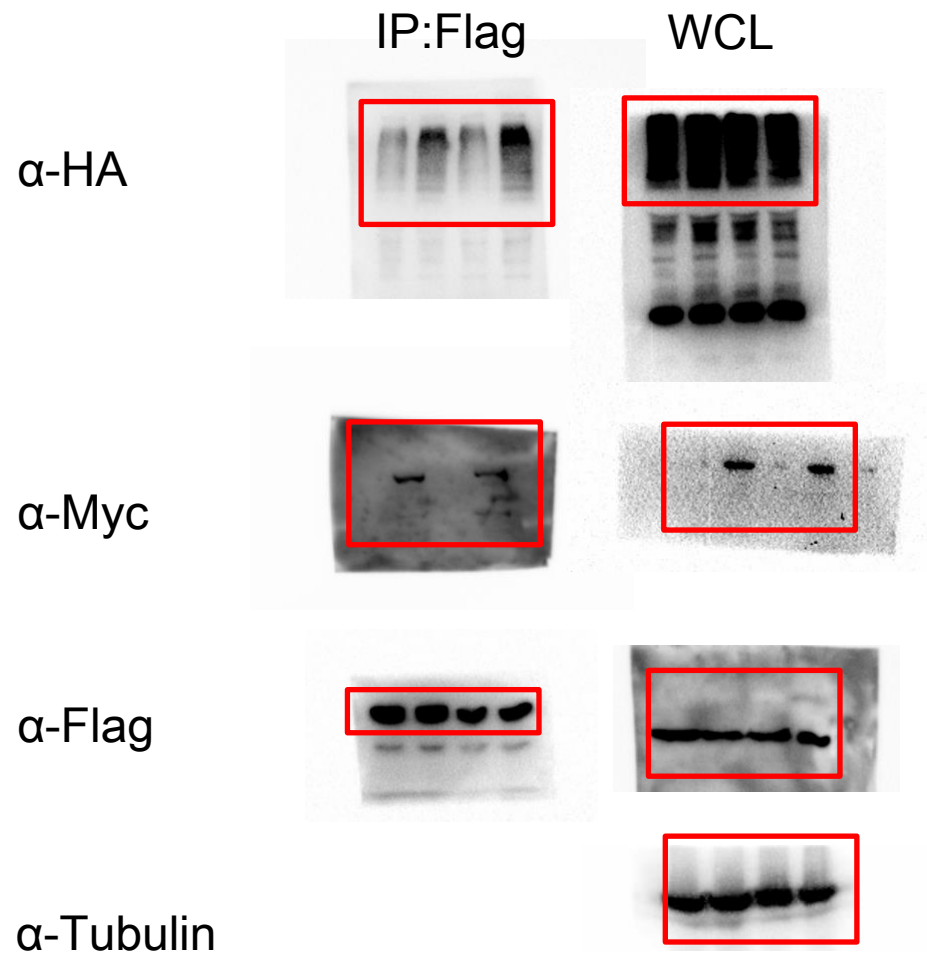

Figure 6

C

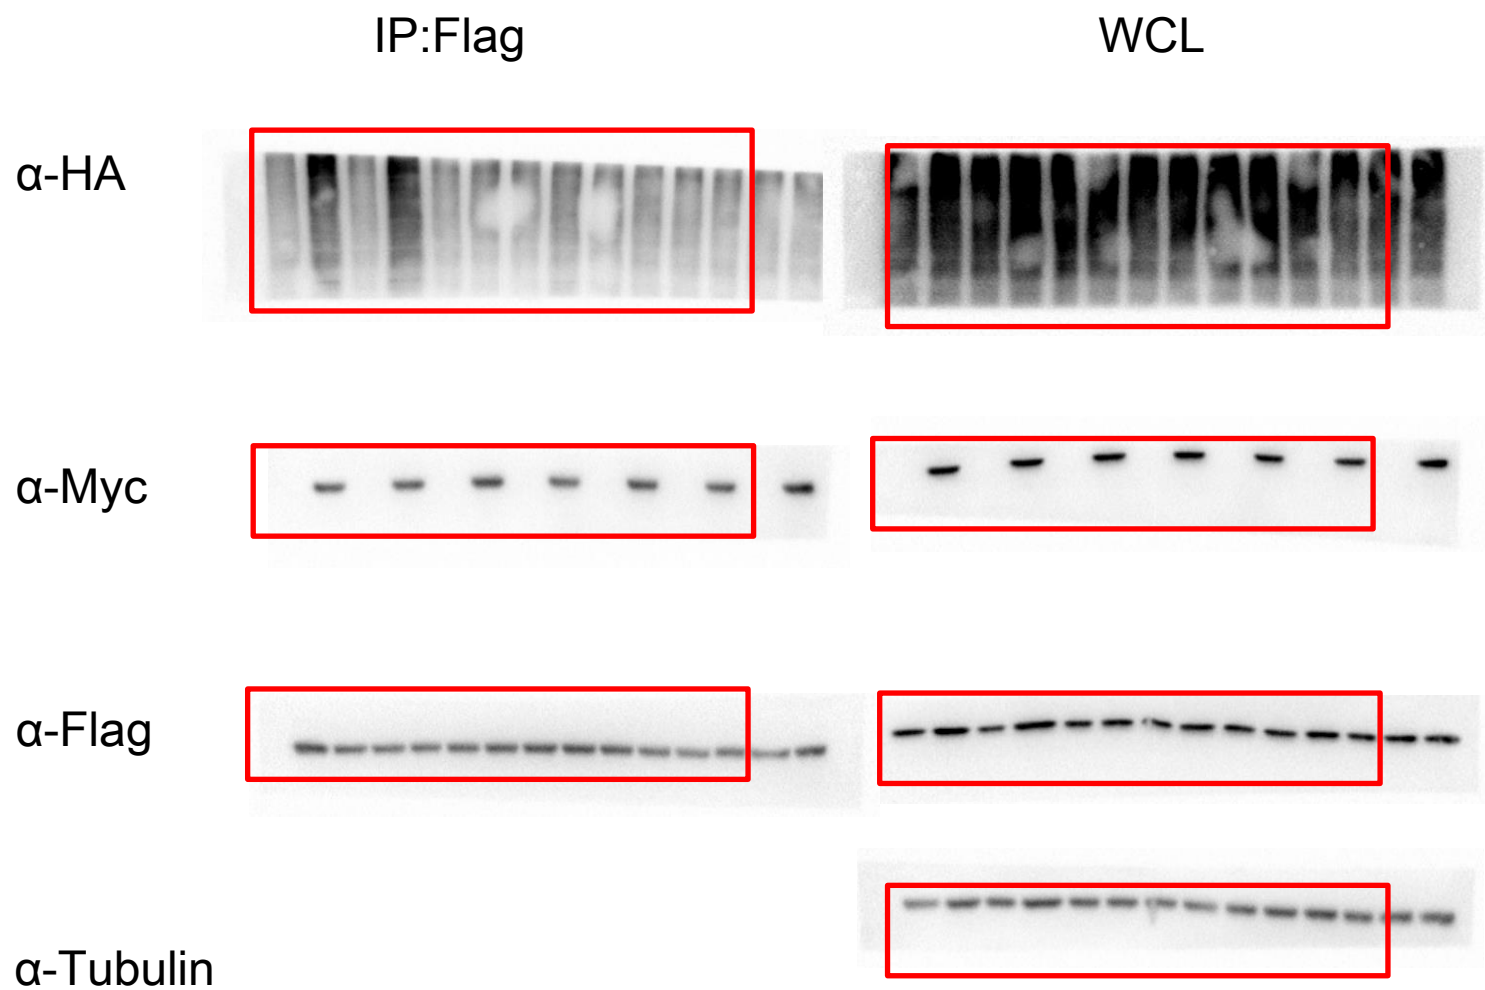

Figure 6

C

$\alpha$ -HA

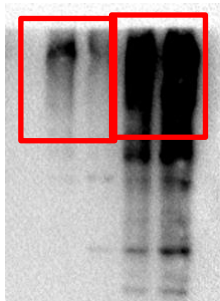

$\alpha$ -Flag

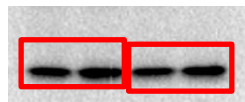

$\alpha$ -Vangl2

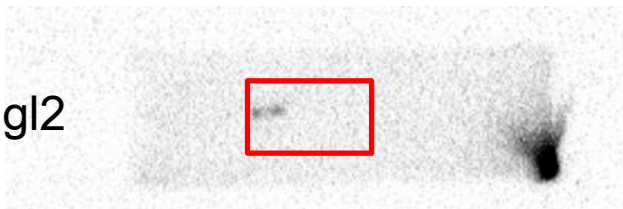

$\alpha$ -Tubulin

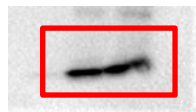

Supplement: fig6-data1 [file elife-87935-fig6-data1-v1.pdf]
