# Supplementary material for: Vangl2 suppresses NF-κB signaling and ameliorates sepsis by targeting p65 for NDP52-mediated autophagic degradation
Source: eLife journal article supplement (doi:10.7554/elife.87935), 2023-05-12

Figure 7

A

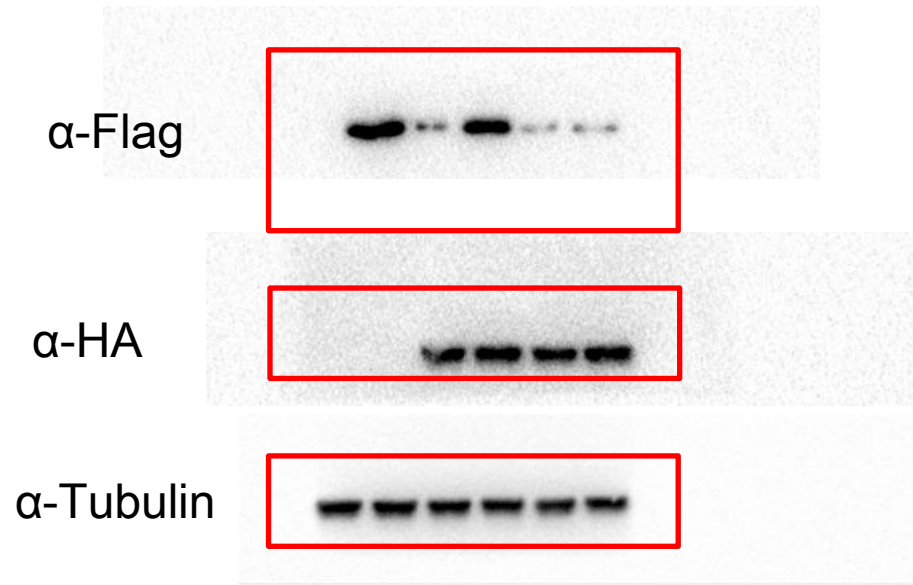

Figure 7

D

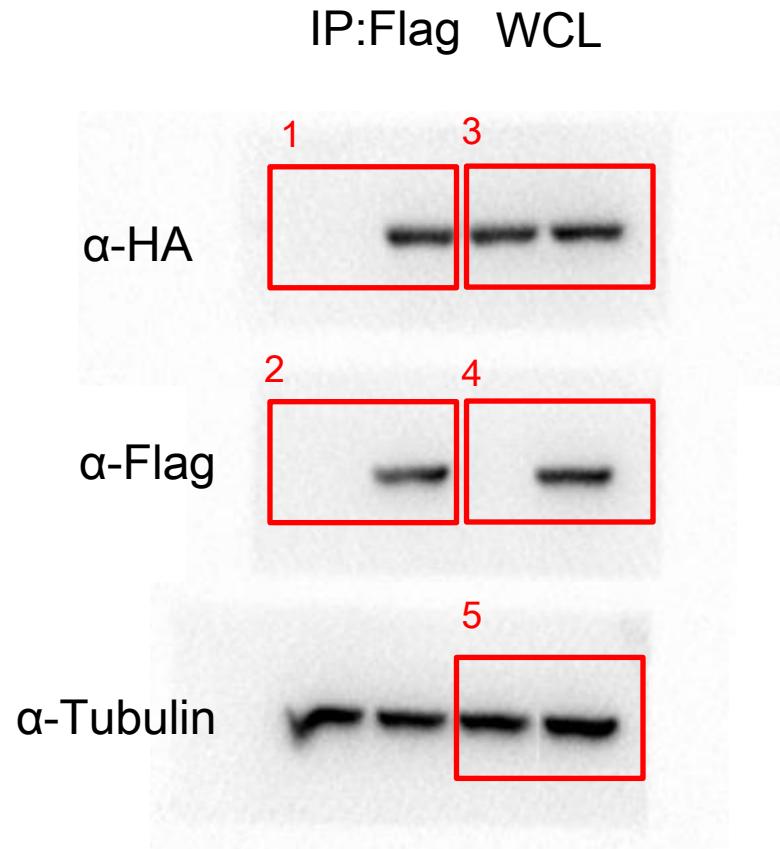

Figure 7

E

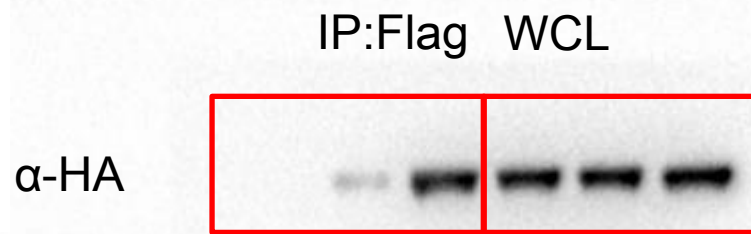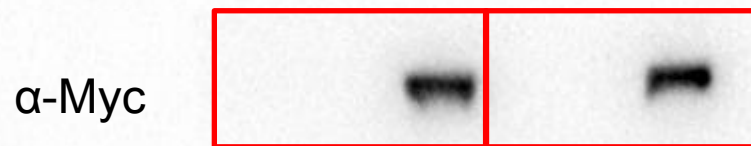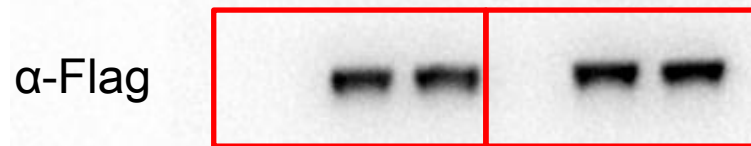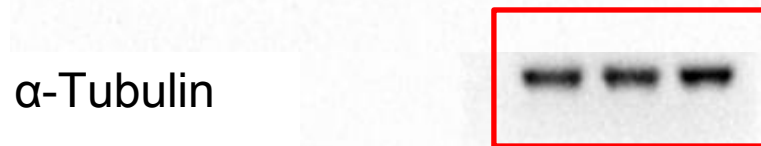

Figure 7

F

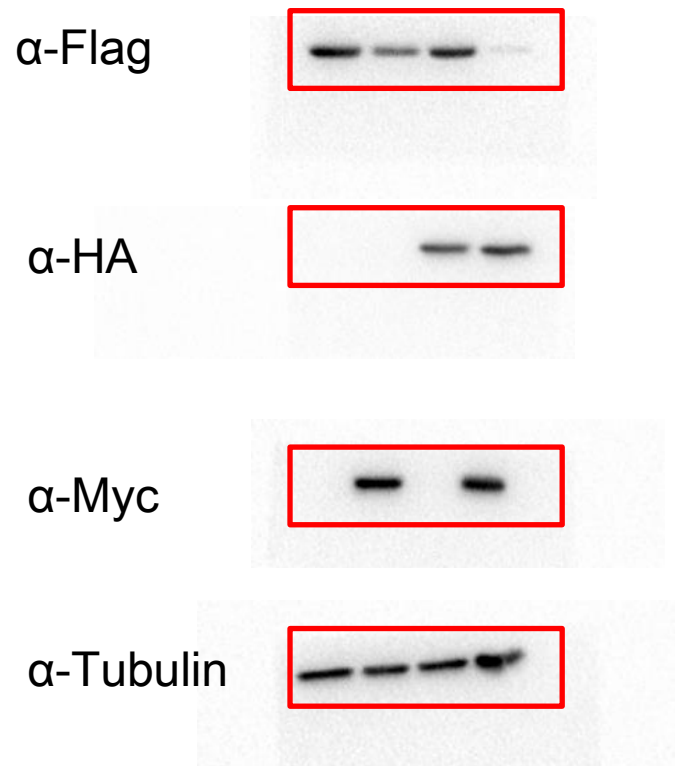

Figure 7

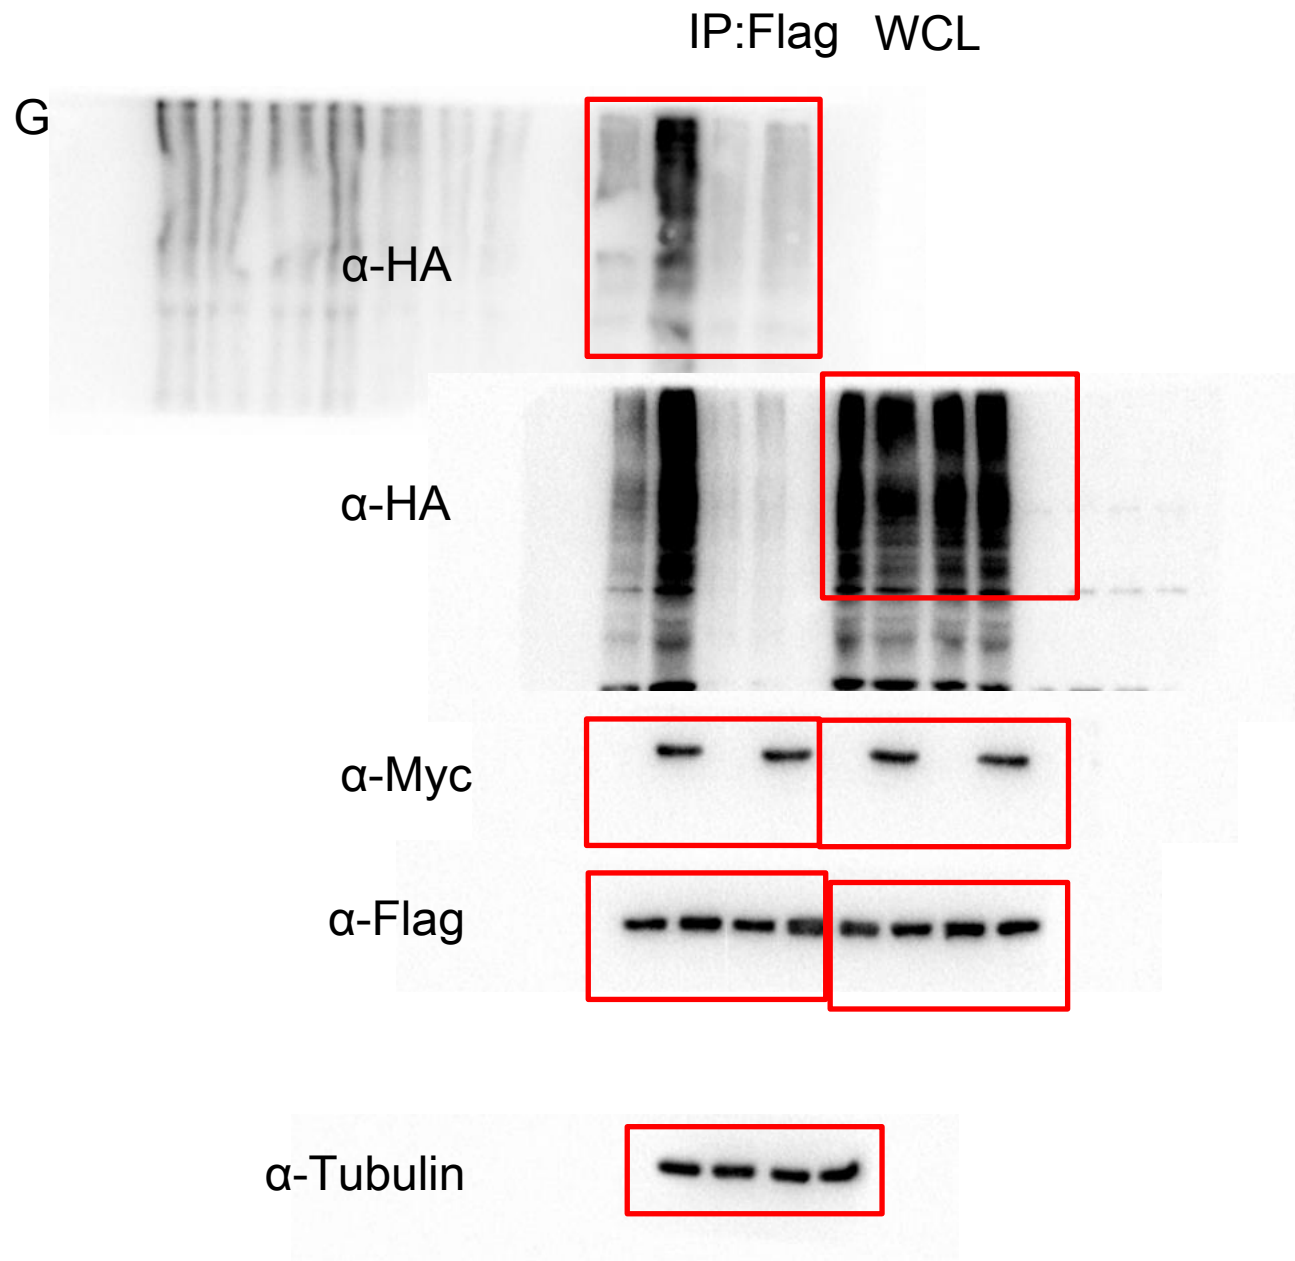

Figure 7

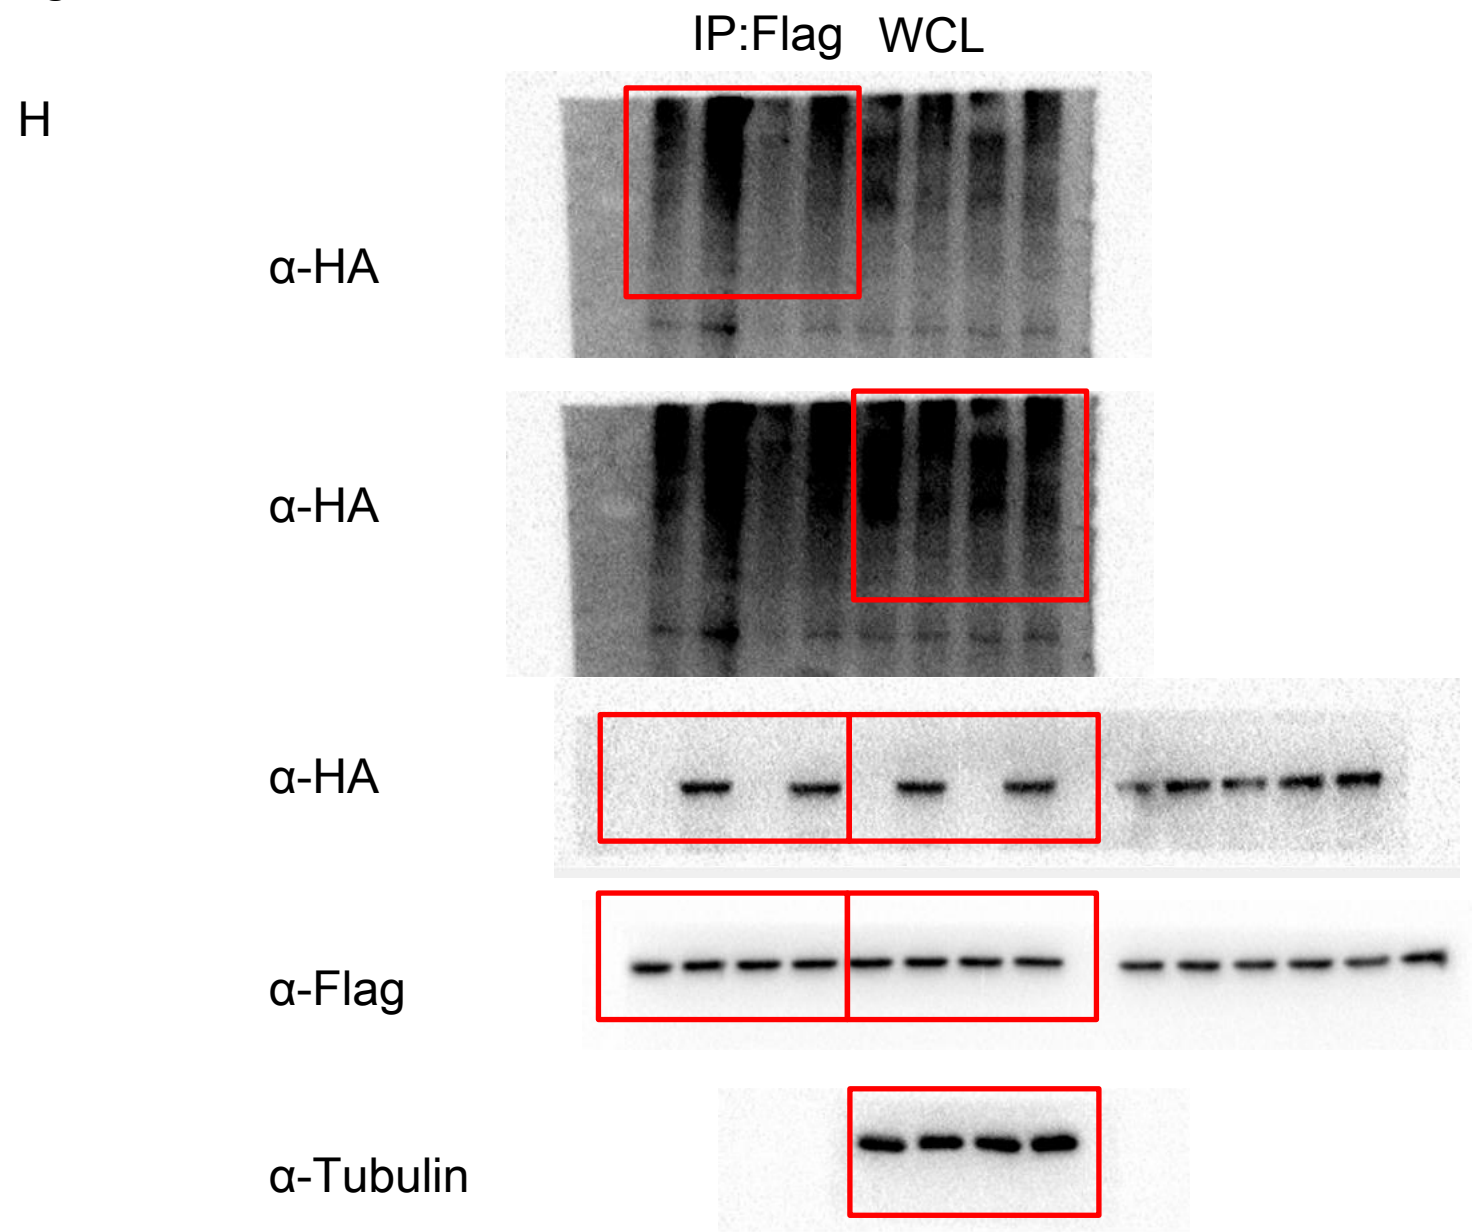

Supplement: fig7-data1 [file elife-87935-fig7-data1-v1.pdf]
