# Supplementary material for: Vangl2 suppresses NF-κB signaling and ameliorates sepsis by targeting p65 for NDP52-mediated autophagic degradation
Source: eLife. 2024 Sep 13;12:RP87935. doi: 10.7554/eLife.87935 (PMC11398866; doi:10.7554/eLife.87935)
Supplement: Figure 1—source data 2. [file elife-87935-fig1-data2.xlsx]

## Sheet: Fig1
A	HC	Sepsis		B		Unsti			LPS				C	time	WT	CKO
Vangl2 mRNA	1.21999	2.86026		Vangl2 mRNA	BM	0.532796	1.8769	1	1.5328	1.8769	1		Percent survial	0	0
	1.35989	1.85902			Liver	18.8795	27.4668	22.7719	7.27711	6.33265	6.78847			6	0
	0.602753	1.4644			LN	18.0752	6.89705	11.1654	120.955	133.955	130.955			6	0
	1	1.98206			Lung	18.3402	42.3278	27.8621	37.5893	52.9396	44.609			10
	1.65438	7.30028			SP	67.4925	58.5118	62.8419	2535.44	2776.6	2653.28			11
	1.93256	5.71851												12		1
	2.32246	6.34203		D										13		1
	1.95092	6.42121		WT		Vangl2△M		WT+LPS		Vangl2△M+LPS				15
	2.031	7.67057		0	0	0	0	0.52	0.67	1.33	1.75			16		1
	1.27691	5.23368		0	0	0	0	0.62	0.62	1.53	1.68			18	1	1
	1.19623	5.99332	unit	0	0	0	0	0.58	0.58	1.42	1.72			19		1
	1.45846	6.21967												20	1	1
	0.832978	2.70929												30	1
	1.00062	2.36603												36	1
	0.660569	3.30035												40	1
	0.819608	2.76575												42	1
														44	1
														48	1
														50	0
														52	0
Il1b mRNA	E	Un	WT	Vangl2△M		Tnfa	E	Un	WT	Vangl2△M		Il6 mRNA	E	Un	WT	Vangl2△M
	1.1	0.968844	8.93547	11.0204			0.97	1.15354	10.4313	32.3632			0.96	1.01392	94.5207	110.148
	0.91	1.03216	8.13126	10.7843			1.03	0.8669	6.05468	24.4679			1.04	0.986272	91.7731	146.119
	1	1	8.52388	10.9017			1	1	7.94723	28.14			1	1	93.1368	126.865
F		WT			Vangl2△M				F		WT			Vangl2△M
IL-1b	0	517.654	579.302	492.773	554.737	542.408	591.538		TNFa	0	749.43	713.182	773.596	818.906	696.568	876.299
	1	759.572	745.405	764.284	856.354	885.097	833.688			1	8624.4	8805.64	7114.05	12385.2	10316	11554.5
	3	1088.75	1101.84	1122.47	1245.15	1138.68	1202.9			3	1353.57	1317.32	1377.74	1423.05	1300.71	1661.68
	6	1512.75	1413.65	1373.24	3251.83	2938.53	2724.65			6	1081.71	1000.15	975.983	1133.06	1081.71	1057.54
F		WT			Vangl2△M
IL-6	0	517.654	579.302	492.773	554.737	542.408	591.538
	1	759.572	745.405	764.284	856.354	885.097	833.688
	3	1088.75	1101.84	1122.47	1245.15	1138.68	1202.9
	6	1512.75	1413.65	1373.24	3251.83	2938.53	2724.65

## Sheet: Fig S1
A	HC	Sepsis	A	HC	Sepsis	A	HC	Sepsis	A	WBC		CRP		IL-6
WBC	6.53	13.86	CPR	10.23	82.61	IL-6	32.2	36.65		28.23	18.23	82.61	60.3	90.2	70.8
	7.52	23.99		5.84	42.58		34.8	65.08		24.33	14.33	70.3	55.3	88.3	66.5
	5.53	18.23		15.32	60.31		30.2	85.3		23.99	13.99	62.61	52.58	85.3	65.08
	6.82	14.33		14.21	55.32		31.2	90.2			13.86		42.58		36.65
	4.52	13.99		8.22	62.61		28.8	88.3		high	low	high	low	high	low
	6.02	28.23		5.82	52.58		20.5	66.5
	5.83	24.33		12.32	70.32		25.5	70.8
	5.72	15.34		9.81	45.32		23.2	42.5
B				C	BMDM					D	NEU					E	pMAC
Vangl2 mRNA	169	232	Vangl2 mRNA	0	3	6	9	12	Vangl2 mRNA	0	3	6	9	12	Vangl2 mRNA	0	3	6	9	12
	117	242		0.968844	11.9355	28.0204	78.3	40.5		0.973876	3.98052	7.06532	4.82194	29.2394		0.973876	105.3	425.3	9.5	70.5
	112	294		1.03216	17.1313	25.7843	68.2	28.3		1.02696	3.14197	3.04061	4.35362	19.7928		1.02696	95.4	350.7	8.5	50.2
		260		1	14.5239	23.9017	73.2	35.2		1.00007	3.53648	4.63496	4.5818	24.0568		1.00007	92.3	375.2	8.8	30.2
		224
H	MON		NEU		Mac			I	MON		NEU		Mac
cell in spleen	0.784068	1.26	3.09408	7.2288	0.219164	0.68256		cell in BM	1.95054	2.45622	1.67442	1.9899	0.209214	0.397578
	0.81454	1.2888	3.26754	7.6608	0.233228	0.73728			2.10482	2.76783	1.80686	2.24235	0.225762	0.448017
	0.808152	1.3055	3.18912	7.48984	0.225896	0.707208			2.05054	2.65225	1.77742	2.05125	0.212121	0.421231
	0.83956	1.33534	3.3679	7.93744	0.240392	0.763904
