# Supplementary material for: Vangl2 suppresses NF-κB signaling and ameliorates sepsis by targeting p65 for NDP52-mediated autophagic degradation
Source: eLife. 2024 Sep 13;12:RP87935. doi: 10.7554/eLife.87935 (PMC11398866; doi:10.7554/eLife.87935)
Supplement: Figure 2—source data 2. [file elife-87935-fig2-data2.xlsx]

## Sheet: Fig 2
E	WT	Vangl2△M	WT	Vangl2△M	E	WT	Vangl2△M	WT	Vangl2△M	F	WT	Vangl2△M	WT	Vangl2△M	F	WT	Vangl2△M	WT	Vangl2△M
IL-6	90.7511	105.106	1220.54	4510.11	TNF-a	63.6656	34.3175	410.075	755.698	IL-6	226.902	305.327	6220.54	22510.1	TNF-a	63.6656	58.9226	910.075	2255.7
	86.2562	89.8491	2694.41	4500.24		31.9174	38.5774	351.613	744.97		286.256	218.649	3694.41	24500.2		31.9174	57.9684	1051.61	2144.97
	54.7481	111.739	1631.64	4605.97		18.311	32.9885	436.506	757.511		254.748	260.661	4631.64	19606		68.6351	36.4305	936.506	2357.51
	unsti		LPS					409.728	626.765		unsti		LPS			68.3625	21.5379	1209.73	2226.76
						unsti		LPS								unsti		LPS
H	WT	Vangl2△M
Percentages of p65 nuclear translocated cells	7.5	18.6
	8.5	19.5
	9.5	20.5

## Sheet: Fig S2
D	WT	Vangl2△M	WT	Vangl2△M	D	WT	Vangl2△M	WT	Vangl2△M	E	WT	Vangl2△M	WT	Vangl2△M	E	WT	Vangl2△M	WT	Vangl2△M
IL-6	1.02	1.12	30.76	90.6	TNF-a	0.985	0.92	4.9	10.25	IL-6	1.02	0.92	3.76	10.6	TNF-a	0.975	1.15	2.9	3.25
	0.98	0.89	30.58	91.46		1	1.08	3.96	10.11		0.99	1.09	3.58	11.46		1.02	0.87	1.96	4.11
	0.952	1	30.4	91.02		1.03	1	4.38	9.11		0.942	1	3.4	11.02		1.03	1	2.38	4.11
	unsti		LPS			unsti		LPS			unsti		LPS			unsti		LPS
F	WT	Vangl2△M	WT	Vangl2△M	F	WT	Vangl2△M	WT	Vangl2△M	F	WT	Vangl2△M	WT	Vangl2△M
IL-6	220.3	250.025	4854.84	5490.27	IL-6	20.3	40.3	1342.64	1799.53	IL-6	20.3	30.3	794.795	1051.44
	230.5	236.925	5025.09	5950.17		30.5	50.5	1541.96	1731.68		30.5	36.5	864.421	1090.06
	240.5	379.236	4631.64	6605.97		40.5	20.5	1403.59	1767.05		40.5	50.5	832.064	1143
	unsti		LPS			unsti		LPS			unsti		LPS
