# Supplementary material for: Vangl2 suppresses NF-κB signaling and ameliorates sepsis by targeting p65 for NDP52-mediated autophagic degradation
Source: eLife. 2024 Sep 13;12:RP87935. doi: 10.7554/eLife.87935 (PMC11398866; doi:10.7554/eLife.87935)
Supplement: Figure 3—source data 2. [file elife-87935-fig3-data2.xlsx]

## Sheet: Fig 3
A	-	0	500	1000	B	-	0	500	1000	C	-	0	500	1000
NK-KB-LUC	1.00224	43.8175	27.7388	22.8439	NK-KB-LUC	1	4.44591	3.37791	2.59242	NK-KB-LUC	1	150.143	93.3779	82.5924
	1.0003	54.6576	33.9194	22.1933		1	3.4338	3.2452	2.8087		1.0278	133.231	103.245	72.8087
	1.00034	50.4395	39.3992	24.7826		1	4.40982	3.14912	2.74883		1	123.31	95.1491	80.7488
						1	3.72961	3.39955	3.32274		1.02369	110.739	88.3996	73.3227
D
NK-KB-LUC	0	0	1000	0	1000	0	1000	0	1000	0	1000	0	1000
	1	732.636	304.38	227.857	130.535	327.857	60.5346	93.8175	12.8439	323.818	82.8439	523.818	142.844
	1	843.784	332.031	224.582	102.709	324.582	82.7089	84.6576	10.1933	344.658	70.1933	544.658	170.193
	1	810.572	292.344	290.511	109.809	390.511	109.809	80.4395	8.78265	350.44	98.7826	510.44	128.783
		myd88		IRAK1		Traf6		IKKa		IKKb		p65
J	EV	0	FL	T1	T2	T3	T4	Pkbd
NK-KB-LUC	1.00012	2478.9	1053.57	2707.83	1173.17	583.519	728.948	953.167
	1	2064.73	725.776	2193.7	1045.41	501.176	650.337	905.406
	1.00001	2437.32	863.245	2583.6	1172.6	534.651	752.815	922.596

## Sheet: Fig S3
A	-	0	250	500	1000	B	-	0	250	500	1000	C	-	0	250	500	1000
NK-KB-LUC	1	732.636	570.126	409.066	304.38	NK-KB-LUC	1	67.567	57.8743	52.5602	32.4342	NK-KB-LUC	1	327.857	167.874	122.58	60.5346
	1	843.784	528.441	453.419	332.031		1	78.662	52.8411	44.3361	27.7019		1	324.582	220.841	131.296	82.7089
	1	810.572	664.667	529.862	292.344		1	76.6114	60.1624	45.2218	25.8291		1	390.511	220.006	155.182	109.809
	Myd88						IRAK1						Traf6
D	-	0	250	500	1000	E	-	0	250	500	1000	F	-	0	250	500	1000
NK-KB-LUC	1.00224	93.8175	47.7388	22.8439	12.8439	NK-KB-LUC	1.00224	323.818	207.739	142.844	82.8439	NK-KB-LUC	1.00224	523.818	307.739	182.844	142.844
	1.0003	84.6576	43.9194	25.1933	10.1933		1.0003	344.658	213.919	155.193	70.1933		1.0003	544.658	313.919	175.193	170.193
	1.00034	80.4395	49.3992	27.7826	8.78265		1.00034	350.44	189.399	137.783	98.7826		1.00034	510.44	389.399	167.783	128.783
	IKKa						IKKb						p65
	WT	Vangl2△M
co-localization of p65 and Vangl2	5.5	8.6
	6.5	9.5
	4.5	10.5
