# Supplementary material for: Vangl2 suppresses NF-κB signaling and ameliorates sepsis by targeting p65 for NDP52-mediated autophagic degradation
Source: eLife. 2024 Sep 13;12:RP87935. doi: 10.7554/eLife.87935 (PMC11398866; doi:10.7554/eLife.87935)
Supplement: Figure 4—source data 2. [file elife-87935-fig4-data2.xlsx]

## Sheet: Fig 4
H	-	0	250	500	1000	-	0	250	500	1000		I	-	0	250	500	1000	-	0	250	500	1000
NK-KB-LUC	1.00224	283.817	157.739	122.844	82.8439	1.00224	223.817	207.739	282.844	242.844		NK-KB-LUC	1.00112	284.678	156.734	124.846	82.3429	1.00214	323.833	307.737	322.844	342.845
	1.0003	264.658	163.919	115.193	70.1933	1.0003	244.658	213.919	275.193	170.193			1.0013	265.657	168.912	116.192	71.2943	1.00021	344.665	343.919	375.193	370.188
	1.00034	270.44	189.399	117.783	88.7826	1.00034	210.44	289.399	207.783	228.783			1.00332	271.428	187.396	118.663	88.6612	1.00014	370.433	389.333	307.767	328.733
	WT					ATG5 KO							WT					ATG5 KO

## Sheet: Fig S4
G	WT	Vangl2△M
co-localization of LC3 and p65	2	135
	0	140
	3	155
