# Supplementary material for: Vangl2 suppresses NF-κB signaling and ameliorates sepsis by targeting p65 for NDP52-mediated autophagic degradation
Source: eLife. 2024 Sep 13;12:RP87935. doi: 10.7554/eLife.87935 (PMC11398866; doi:10.7554/eLife.87935)
Supplement: Figure 5—source data 2. [file elife-87935-fig5-data2.xlsx]

## Sheet: Fig 5
G	-	0	250	500	1000	-	0	250	500	1000
NK-KB-LUC	1.00224	283.817	157.739	122.844	82.8439	1.00224	343.817	357.739	362.844	362.844
	1.0003	264.658	163.919	115.193	70.1933	1.0003	344.658	363.919	375.193	370.193
	1.00034	270.44	189.399	117.783	88.7826	1.00034	352.44	359.399	377.783	368.783
	WT					NDP52 KO

## Sheet: Fig S5
G	-	0	250	500	1000	-	0	250	500	1000
NK-KB-LUC	1.00111	281.668	157.325	121.845	82.7759	1.00122	363.812	247.712	142.842	112.814
	1.00126	263.652	163.449	116.126	70.1613	1.00062	364.652	243.911	145.191	110.191
	1.00132	271.445	187.311	117.734	88.7666	1.00014	372.432	249.391	137.782	108.773
	WT					p62 KO
