# Supplementary material for: Vangl2 suppresses NF-κB signaling and ameliorates sepsis by targeting p65 for NDP52-mediated autophagic degradation
Source: eLife. 2024 Sep 13;12:RP87935. doi: 10.7554/eLife.87935 (PMC11398866; doi:10.7554/eLife.87935)
Supplement: Figure 7—source data 3. [file elife-87935-fig7-data3.xlsx]

## Sheet: Fig 7
A			Scr siRNA	Pdlim2 siRNA	Usp7 siRNA	Trim21 siRNA		B	Scr siRNA	Scr siRNA	Pdlim2 siRNA	Pdlim2 siRNA		C	Scr siRNA	Scr siRNA	Pdlim2 siRNA	Pdlim2 siRNA
NF-KB-LUC	1.00002	1537.87	1006.73	1358.58	726.733	776.733		IL-6	1.04	30.66	439.86	65.04		IL-1B	1.11	1255.66	3742.66	1158.64
	1	1468	926	1398	686	726			0.97	33.69	470.62	76.72			0.9	1316.75	3688.3	1220.32
	1	1500	950	1480	750	750			1	32.14	454.98	70.64			1	1285.84	3715.38	1189.08
									EV	Vangl2	EV	Vangl2			EV	Vangl2	EV	Vangl2

## Sheet: Fig S6
B					C					D
Pdlim2 mRNA	Un	WT	CKO		Usp7 mRNA	Un	WT	CKO		Trim27 mRNA	Un	WT	CKO
	0.91	2.63	1.81			0.91	2.43	0.52			0.91	7.89	5.71
	1.1	2.59	1.92			1.1	2.45	0.65			1.1	7.92	8.61
	1	2.61	1.86			1	2.44	0.58			1	7.91	7.01
E	Scr siRNA	Pdlim2 siRNA			F	Scr siRNA	Usp7 siRNA			G	Scr siRNA	Trim27 siRNA
Pdlim2 mRNA	1	0.66			Usp7 mRNA	0.9795	0.66			Trim27 mRNA	1	0.66
	0.9983	0.64				1.0009	0.64				0.98	0.62
	1.053	0.74				1	0.74				1.00782	0.69
